# Supplementary material for: Visible-light-induced dehydrogenative sulfonylation of tertiary amines under transition-metal- and photocatalyst-free conditions
Source: Royal Society of Chemistry journal article supplement (doi:10.1039/d1gc04703e), 2022-01-01

## Electronic Supplementary Information

for

### Visible-light-induced dehydrogenative sulfonylation of tertiary amines under transition-metal- and photocatalyst-free conditions

Jinwen Tong, Heng Li, Yan Zhu, Ping Liu\* and Peipei Sun\*

*School of Chemistry and Materials Science, Jiangsu Provincial Key Laboratory of Material Cycle  
Processes and Pollution Control, Jiangsu Collaborative Innovation Center of Biomedical  
Functional Materials, Nanjing Normal University, Nanjing 210023, China*  
*pingliu@njnu.edu.cn; sunpeipei@njnu.edu.cn*

#### Contents

|                                                                              |         |
|------------------------------------------------------------------------------|---------|
| 1. General information.....                                                  | S2      |
| 2. Experimental procedures.....                                              | S2-S3   |
| 3. Control experiments.....                                                  | S4-S5   |
| 4. Experimental data for the products <b>3</b> , <b>4</b> and <b>D</b> ..... | S5-S17  |
| 5. References.....                                                           | S17     |
| 6. <sup>1</sup> H and <sup>13</sup> C NMR spectra of the products.....       | S18-S49 |

## 1 General information

All reagents were obtained from commercial suppliers and used without further purification. Reactions were monitored by thin layer chromatography. Column chromatography was performed using silica gel (300–400 mesh). The NMR spectra were recorded on a Bruker Avance 400 spectrometer at 400 MHz ( $^1\text{H}$ ) and 100 MHz ( $^{13}\text{C}$ ) in  $\text{CDCl}_3$  or  $\text{DMSO}-d_6$  using tetramethylsilane as the internal standard. The following abbreviations were used to explain the multiplicities: s = singlet, d = doublet, dd = doublet of doublet, t = triplet, m = multiplet, q = quartet. High-resolution mass spectra were obtained with an AB Triple 5600 mass spectrometer by ESI on a TOF mass analyzer. Melting points are uncorrected.

## 2 Experimental procedures

### 2.1 The photos of the photochemical reactor

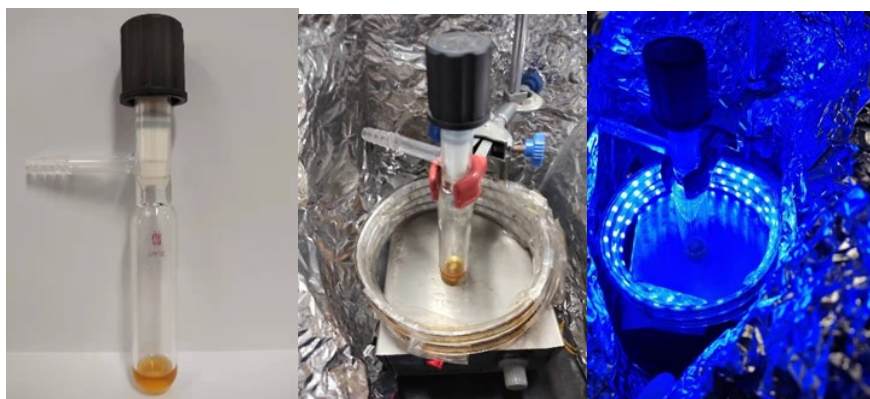

### 2.2 General procedure for the preparation of 3

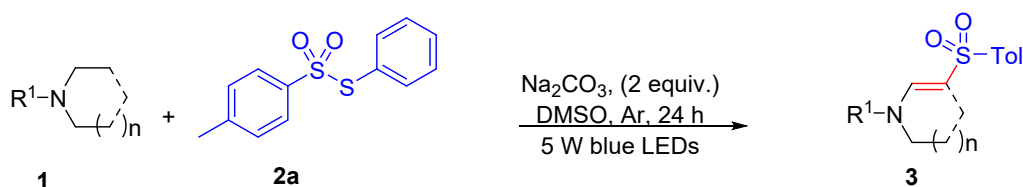

An oven-dried Schlenk tube (25 mL) was equipped with a magnetic stir bar and charged with *S*-phenyl 4-methylbenzenesulfonothioate (158.4 mg, 0.6 mmol, 3.0 equiv.),  $\text{Na}_2\text{CO}_3$  (42.4 mg, 0.4 mmol, 2.0 equiv.). The flask was evacuated and backfilled with argon for 3 times, and then DMSO (2 mL) and tertiary amines (0.2 mmol, 1.0 equiv.) were added. The reaction mixture was stirred under 5 W blue LED strip (425–465 nm) irradiation at room temperature for 24 h, then diluted with water (50 mL) and extracted with EtOAc (15 mL  $\times$  3). The combined organic phases were washed with brine (15 mL), dried over anhydrous  $\text{Na}_2\text{SO}_4$ , filtered and concentrated in vacuo.

The resulting residue was purified by silica gel column chromatography with petroleum ether/ethyl acetate as eluent to afford the desired products **3**.

## 2.2 General procedure for the preparation of **4**

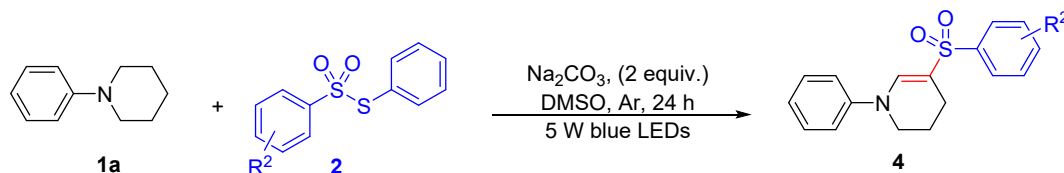

An oven-dried Schlenk tube (25 mL) was equipped with a magnetic stir bar and charged with *S*-phenyl benzenesulfonylthioate (0.6 mmol, 3.0 equiv.),  $\text{Na}_2\text{CO}_3$  (42.4 mg, 0.4 mmol, 2.0 equiv.). The flask was evacuated and backfilled with argon for 3 times, and then DMSO (2 mL) and 1-phenylpiperidine (32.2 mg, 32  $\mu\text{L}$ , 0.2 mmol, 1.0 equiv.) were added. The reaction mixture was stirred under 5 W blue LED strip (425-465 nm) irradiation at room temperature for 24 h, then diluted with water (50 mL) and extracted with EtOAc (15 mL  $\times$  3). The combined organic phases were washed with brine (15 mL), dried over anhydrous  $\text{Na}_2\text{SO}_4$ , filtered and concentrated in vacuo. The resulting residue was purified by silica gel column chromatography with petroleum ether/ethyl acetate as eluent to afford the desired products **4**.

## 2.3 Gram-scale synthesis of **3a**

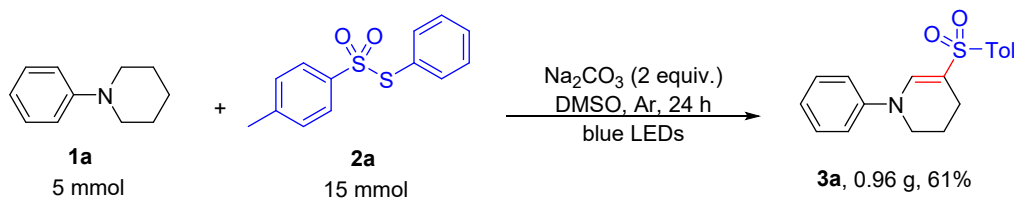

An oven-dried Schlenk tube (100 mL) was equipped with a magnetic stir bar and charged with  $\text{Na}_2\text{CO}_3$  (1.06 g, 10 mmol, 2.0 equiv.), *S*-phenyl-4-methylbenzenesulfonylthioate (3.96 g, 15 mmol, 3.0 equiv.). The flask was evacuated and backfilled with argon for 3 times, and then DMSO (20 mL) and 1-phenylpiperidine (0.81 g, 0.81 mL, 5 mmol, 1.0 equiv.) were added. The reaction mixture was stirred under 5 W blue LED strip (425-465 nm) irradiation at room temperature for 24 h. Once completed, the mixture was diluted with water (100 mL) and extracted with EtOAc (30 mL  $\times$  3). The combined organic phases were washed with brine (50 mL), dried over anhydrous  $\text{Na}_2\text{SO}_4$ , filtered and concentrated in vacuo. The residue was purified by silica gel chromatography using petroleum ether/EtOAc (5:1, v/v) as eluent to afford the pure product **3a** in 61% yield.

### 3 Control experiments

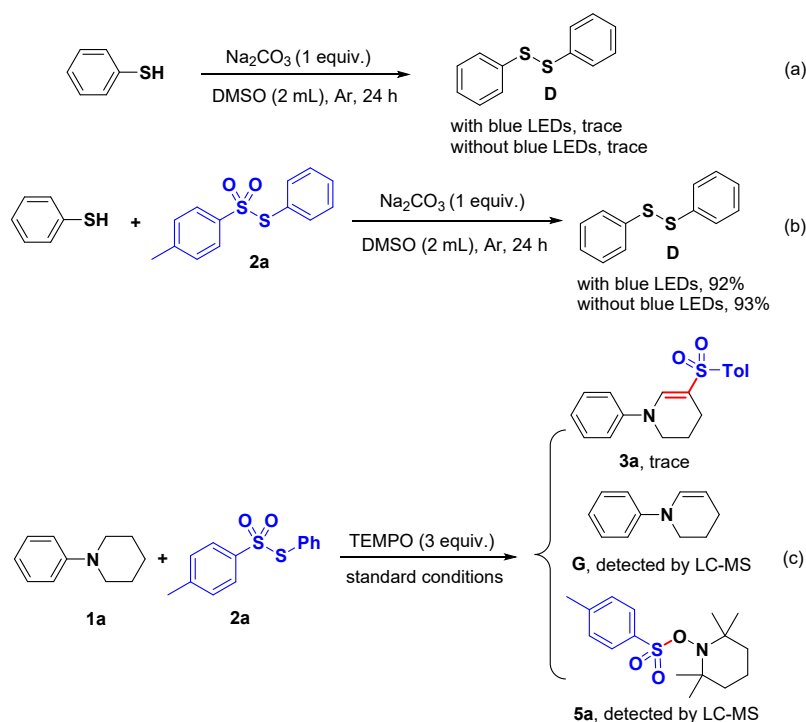

(a) An oven-dried Schlenk tube (25 mL) was equipped with a magnetic stir bar and charged with benzenethiol (22.0 mg, 0.2 mmol, 1.0 equiv.) and  $\text{Na}_2\text{CO}_3$  (21.2 mg, 0.2 mmol, 1.0 equiv.). The flask was evacuated and backfilled with argon for 3 times, and then DMSO (2 mL) were added. The reaction mixture was stirred under 5 W blue LED strip (425-465 nm) irradiation at room temperature for 24 h. After the reaction was stopped, trace amounts of the desired product **3a** were detected by TLC and LC-MS. When there was no blue LED strip irradiation in the reaction, similar results were obtained.

(b) An oven-dried Schlenk tube (25 mL) was equipped with a magnetic stir bar and charged with benzenethiol (22.0 mg, 0.2 mmol, 1.0 equiv.), *S*-phenyl 4-methylbenzenesulfonothioate (52.8 mg, 0.2 mmol, 1.0 equiv.) and  $\text{Na}_2\text{CO}_3$  (21.2 mg, 0.2 mmol, 1.0 equiv.). The flask was evacuated and backfilled with argon for 3 times, and then DMSO (2 mL) were added. The reaction mixture was stirred under 5 W blue LED strip (425-465 nm) irradiation at room temperature for 24 h. After the reaction completed, the reaction mixture was diluted with  $\text{H}_2\text{O}$  (15 mL) and extracted with EtOAc ( $3 \times 15$  mL). The combined organic layers were washed with brine (20 mL), dried over anhydrous  $\text{Na}_2\text{SO}_4$ , filtered and concentrated in vacuo. The residue was purified by silica gel chromatography using petroleum ether/EtOAc (100:1, v/v) as eluent to afford the pure product **D** as a white solid in

92% yield. When there was no blue LED strip irradiation in the reaction, similar results were obtained.

(c) An oven-dried Schlenk tube (25 mL) was equipped with a magnetic stir bar and charged with *S*-phenyl 4-methylbenzenesulfonothioate (158.4 mg, 0.6 mmol, 3.0 equiv.), Na<sub>2</sub>CO<sub>3</sub> (42.4 mg, 0.4 mmol, 2.0 equiv.) and TEMPO (93.8 mg, 0.6 mmol, 3.0 equiv.). The flask was evacuated and backfilled with argon for 3 times, and then DMSO (2 mL) and 1-phenylpiperidine (32.2 mg, 32  $\mu$ L, 0.2 mmol, 1.0 equiv.) were added. The reaction mixture was stirred under 5 W blue LED strip (425-465 nm) irradiation at room temperature for 24 h. After the reaction was stopped, trace amounts of the desired product **3a** were detected by TLC and LC-MS, indicating that the reaction was inhibited. Meanwhile, a trapping product **5a** and 1-phenyl-1,2,3,4-tetrahydropyridine (**G**) was observed through the LC-MS analysis from the reaction.

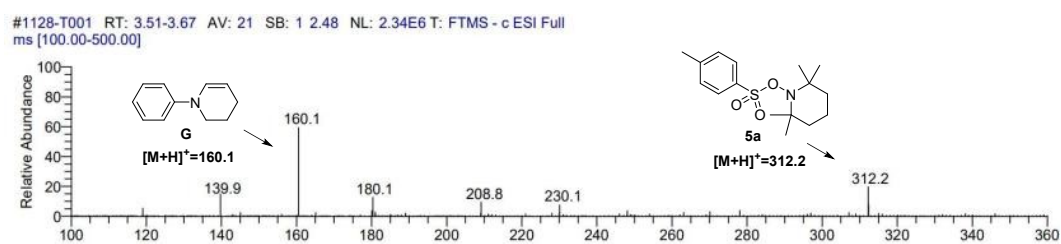

**Figure S1** LC-MS analysis of the radical-trapping product **5a** and 1-phenyl-1,2,3,4-tetrahydropyridine (**G**).

#### 4 Experimental data for the products **3**, **4** and **D**

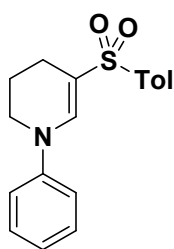

**1-Phenyl-5-tosyl-1,2,3,4-tetrahydropyridine (3a).**<sup>1</sup> Purified by silica gel column chromatography with petroleum ether/ethyl acetate (5:1, v/v) as eluent. White solid (139.0 mg, 74% yield). mp 134–136 °C. <sup>1</sup>H NMR (400 MHz, CDCl<sub>3</sub>)  $\delta$  (ppm) 7.87 (s, 1H), 7.77 (d, *J* = 7.9 Hz, 2H), 7.39–7.29 (m, 4H), 7.12–7.08 (m, 3H), 3.57 (t, *J* = 5.6 Hz, 2H), 2.43 (s, 3H), 2.29 (t, *J* = 6.3 Hz, 2H), 2.02–1.96 (m, 2H). <sup>13</sup>C NMR (100 MHz, CDCl<sub>3</sub>)  $\delta$  (ppm) 145.4, 142.9, 139.1, 138.9, 129.6, 129.5, 127.2, 123.4, 117.7, 108.0, 45.8, 21.6, 21.2, 20.0.

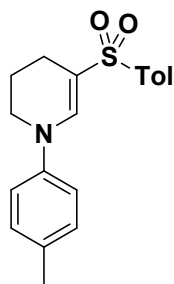

**1-(*p*-Tolyl)-5-tosyl-1,2,3,4-tetrahydropyridine (3b).**<sup>1</sup> Purified by silica gel column chromatography with petroleum ether/ethyl acetate (5:1, v/v) as eluent. White solid (143.3 mg, 73% yield). mp 91–93 °C. <sup>1</sup>H NMR (400 MHz, CDCl<sub>3</sub>)  $\delta$  (ppm) 7.83 (s, 1H), 7.76 (d,  $J$  = 8.2 Hz, 2H), 7.29 (d,  $J$  = 8.0 Hz, 2H), 7.16 (d,  $J$  = 8.0 Hz, 2H), 6.98 (d,  $J$  = 8.1 Hz, 2H), 3.53 (t,  $J$  = 5.5 Hz, 2H), 2.42 (s, 3H), 2.33 (s, 3H), 2.28 (t,  $J$  = 6.2 Hz, 2H), 1.99–1.93 (m, 2H). <sup>13</sup>C NMR (100 MHz, CDCl<sub>3</sub>)  $\delta$  (ppm) 143.1, 142.8, 139.4, 139.1, 133.1, 130.0, 129.6, 127.1, 117.9, 107.1, 46.0, 21.6, 21.1, 20.7, 20.0.

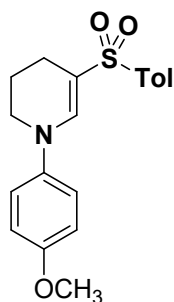

**1-(4-Methoxyphenyl)-5-tosyl-1,2,3,4-tetrahydropyridine (3c).**<sup>1</sup> Purified by silica gel column chromatography with petroleum ether/ethyl acetate (3:1, v/v) as eluent. white solid (142.1 mg, 69% yield). mp 176–178 °C. <sup>1</sup>H NMR (400 MHz, CDCl<sub>3</sub>)  $\delta$  (ppm) 7.77–7.75 (m, 3H), 7.30 (d,  $J$  = 8.0 Hz, 2H), 7.03 (d,  $J$  = 9.0 Hz, 2H), 6.90 (d,  $J$  = 9.0 Hz, 2H), 3.82 (s, 3H), 3.55–3.52 (m, 2H), 2.43 (s, 3H), 2.28 (t,  $J$  = 6.2 Hz, 2H), 2.00–1.94 (m, 2H). <sup>13</sup>C NMR (100 MHz, CDCl<sub>3</sub>)  $\delta$  (ppm) 156.2, 142.7, 139.9, 139.3, 139.2, 129.5, 127.1, 119.9, 114.7, 106.3, 55.6, 46.6, 21.5, 21.2, 19.9.

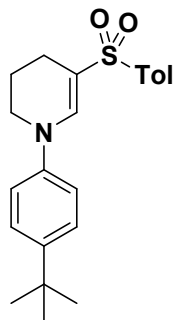

**1-(4-(*tert*-Butyl)phenyl)-5-tosyl-1,2,3,4-tetrahydropyridine (3d).**<sup>1</sup> Purified by silica gel column

chromatography with petroleum ether/ethyl acetate (5:1, v/v) as eluent. Yellow viscous liquid (161.7 mg, 73% yield).  $^1\text{H}$  NMR (400 MHz,  $\text{CDCl}_3$ )  $\delta$  (ppm) 7.86 (d,  $J = 1.1$  Hz, 1H), 7.78–7.75 (m, 2H), 7.41–7.37 (m, 2H), 7.31–7.28 (m, 2H), 7.06–7.02 (m, 2H), 3.58–3.55 (m, 2H), 2.43 (s, 3H), 2.31–2.28 (m, 2H), 2.01–1.95 (m, 2H), 1.34 (s, 9H).  $^{13}\text{C}$  NMR (100 MHz,  $\text{CDCl}_3$ )  $\delta$  (ppm) 146.4, 143.0, 142.8, 139.3, 139.1, 129.6, 127.1, 126.3, 117.5, 107.3, 45.9, 34.3, 31.4, 21.6, 21.2, 20.0.

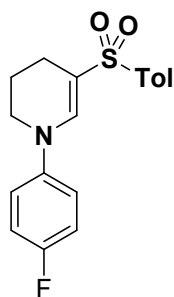

**1-(4-Fluorophenyl)-5-tosyl-1,2,3,4-tetrahydropyridine (3e).**<sup>1</sup> Purified by silica gel column chromatography with petroleum ether/ethyl acetate (4:1, v/v) as eluent. White solid (141.1 mg, 71% yield). mp 174–176 °C.  $^1\text{H}$  NMR (400 MHz,  $\text{CDCl}_3$ )  $\delta$  (ppm) 7.77–7.75 (m, 3H), 7.31 (d,  $J = 7.9$  Hz, 2H), 7.09–7.02 (m, 4H), 3.54 (t,  $J = 5.5$  Hz, 2H), 2.44 (s, 3H), 2.29 (t,  $J = 6.2$  Hz, 2H), 2.01–1.96 (m, 2H).  $^{13}\text{C}$  NMR (100 MHz,  $\text{CDCl}_3$ )  $\delta$  (ppm) 159.1 (d,  $J = 243.2$  Hz), 142.9, 141.9 (d,  $J = 2.9$  Hz), 139.3, 138.9, 129.6, 127.2, 119.6 (d,  $J = 8.0$  Hz), 116.2 (d,  $J = 22.7$  Hz), 108.0, 46.4, 21.6, 21.1, 19.9.

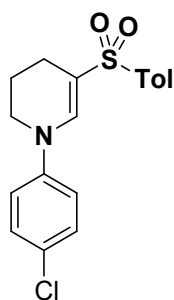

**1-(4-Chlorophenyl)-5-tosyl-1,2,3,4-tetrahydropyridine (3f).**<sup>1</sup> Purified by silica gel column chromatography with petroleum ether/ethyl acetate (5:1, v/v) as eluent. White solid (135.4 mg, 65% yield). mp 200–202 °C.  $^1\text{H}$  NMR (400 MHz,  $\text{CDCl}_3$ )  $\delta$  (ppm) 7.80–7.75 (m, 3H), 7.32 (dd,  $J = 8.4$ , 4.0 Hz, 4H), 7.01 (d,  $J = 8.9$  Hz, 2H), 3.54 (t,  $J = 5.5$  Hz, 2H), 2.44 (s, 3H), 2.29 (t,  $J = 6.2$  Hz, 2H), 2.02–1.96 (m, 2H).  $^{13}\text{C}$  NMR (100 MHz,  $\text{CDCl}_3$ )  $\delta$  (ppm) 143.9, 143.1, 138.7, 138.4, 129.6, 129.5, 128.5, 127.2, 118.8, 109.1, 45.9, 21.6, 21.1, 19.9.

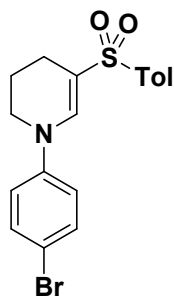

**1-(4-Bromophenyl)-5-tosyl-1,2,3,4-tetrahydropyridine (3g).**<sup>1</sup> Purified by silica gel column chromatography with petroleum ether/ethyl acetate (5:1, v/v) as eluent. White solid (143.1 mg, 61% yield). mp 203–205 °C. <sup>1</sup>H NMR (400 MHz, CDCl<sub>3</sub>)  $\delta$  (ppm) 7.81–7.75 (m, 3H), 7.48–7.44 (m, 2H), 7.31 (d,  $J$  = 8.1 Hz, 2H), 6.98–6.94 (m, 2H), 3.55–3.52 (m, 2H), 2.44 (s, 3H), 2.29 (t,  $J$  = 6.1 Hz, 2H), 2.02–1.96 (m, 2H). <sup>13</sup>C NMR (100 MHz, CDCl<sub>3</sub>)  $\delta$  (ppm) 144.4, 143.1, 138.7, 138.3, 132.4, 129.6, 127.2, 119.1, 116.0, 109.4, 45.8, 21.6, 21.1, 19.9.

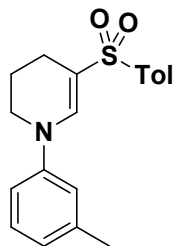

**1-(*m*-Tolyl)-5-tosyl-1,2,3,4-tetrahydropyridine (3h).** Purified by silica gel column chromatography with petroleum ether/ethyl acetate (4:1, v/v) as eluent. White solid (127.58 mg, 65% yield). mp 110–112 °C. <sup>1</sup>H NMR (400 MHz, CDCl<sub>3</sub>)  $\delta$  (ppm) 7.87 (s, 1H), 7.77 (d,  $J$  = 8.3 Hz, 2H), 7.30 (d,  $J$  = 8.0 Hz, 2H), 7.24 (t,  $J$  = 8.1 Hz, 1H), 6.92–6.87 (m, 3H), 3.56–3.53 (m, 2H), 2.42 (s, 3H), 2.37 (s, 3H), 2.28 (t,  $J$  = 6.3 Hz, 2H), 2.00–1.94 (m, 2H). <sup>13</sup>C NMR (100 MHz, CDCl<sub>3</sub>)  $\delta$  (ppm) 145.4, 142.9, 139.5, 139.2, 139.0, 129.6, 129.3, 127.1, 124.2, 118.5, 114.8, 107.7, 45.9, 21.6, 21.5, 21.2, 20.0. HRMS (ESI)  $m/z$ :  $[M + H]^+$  Calcd for C<sub>19</sub>H<sub>22</sub>NO<sub>2</sub>S<sup>+</sup> 328.1366; Found 328.1366.

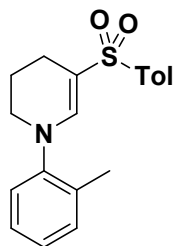

**1-(*o*-Tolyl)-5-tosyl-1,2,3,4-tetrahydropyridine (3i).** Purified by silica gel column chromatography with petroleum ether/ethyl acetate (4:1, v/v) as eluent. White solid (133.5 mg, 68%

yield). mp 158–160 °C.  $^1\text{H}$  NMR (400 MHz,  $\text{CDCl}_3$ )  $\delta$  (ppm) 7.75 (d,  $J$  = 8.2 Hz, 2H), 7.45 (s, 1H), 7.30 (d,  $J$  = 8.0 Hz, 2H), 7.25–7.17 (m, 3H), 7.06 (dd,  $J$  = 7.3, 1.8 Hz, 1H), 3.41–3.38 (m, 2H), 2.42 (s, 3H), 2.29 (d,  $J$  = 8.6 Hz, 5H), 1.99–1.93 (m, 2H).  $^{13}\text{C}$  NMR (100 MHz,  $\text{CDCl}_3$ )  $\delta$  (ppm) 145.4, 142.9, 142.6, 139.4, 133.4, 131.6, 129.6, 127.1, 127.0, 126.9, 125.6, 104.4, 48.3, 21.5, 21.4, 20.0, 18.2. HRMS (ESI)  $m/z$ :  $[\text{M} + \text{H}]^+$  Calcd for  $\text{C}_{19}\text{H}_{22}\text{NO}_2\text{S}^+$  328.1366; Found 328.1365.

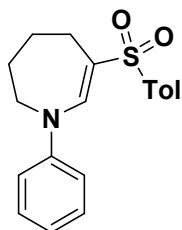

**1-Phenyl-6-tosyl-2,3,4,5-tetrahydro-1H-azepine (3j).**<sup>1</sup> Purified by silica gel column chromatography with petroleum ether/ethyl acetate (8:1, v/v) as eluent. Yellow viscous liquid (141.3 mg, 72% yield).  $^1\text{H}$  NMR (400 MHz,  $\text{CDCl}_3$ )  $\delta$  (ppm) 7.80–7.75 (m, 3H), 7.36–7.29 (m, 4H), 7.12–7.10 (m, 3H), 3.83–3.80 (m, 2H), 2.47–2.42 (m, 2H), 2.42 (s, 3H), 1.86 (t,  $J$  = 5.1 Hz, 2H), 1.79–1.73 (m, 2H).  $^{13}\text{C}$  NMR (100 MHz,  $\text{CDCl}_3$ )  $\delta$  (ppm) 147.3, 144.6, 142.9, 139.0, 129.6, 129.4, 127.3, 123.9, 119.7, 113.6, 51.7, 28.0, 26.0, 25.6, 21.6.

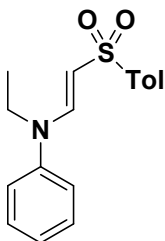

**(E)-N-ethyl-N-(2-tosylvinyl)aniline (3k).** Purified by silica gel column chromatography with petroleum ether/ethyl acetate (8:1, v/v) as eluent. Colorless viscous liquid (99.4 mg, 55% yield).  $^1\text{H}$  NMR (400 MHz,  $\text{CDCl}_3$ )  $\delta$  (ppm) 7.76–7.68 (m, 3H), 7.32 (t,  $J$  = 7.9 Hz, 2H), 7.24 (d,  $J$  = 8.0 Hz, 2H), 7.16–7.09 (m, 3H), 5.28 (d,  $J$  = 13.1 Hz, 1H), 3.59 (q,  $J$  = 7.2 Hz, 2H), 2.35 (s, 3H), 1.15 (t,  $J$  = 7.2 Hz, 3H).  $^{13}\text{C}$  NMR (100 MHz,  $\text{CDCl}_3$ )  $\delta$  (ppm) 146.1, 144.5, 142.6, 141.6, 129.7, 129.6, 126.4, 125.5, 121.6, 98.0, 45.8, 21.5, 11.9. HRMS (ESI)  $m/z$ :  $[\text{M} + \text{H}]^+$  Calcd for  $\text{C}_{17}\text{H}_{20}\text{NO}_2\text{S}^+$  302.1209; Found 302.1208.

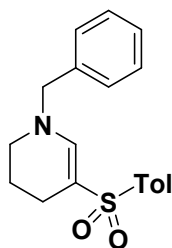

**1-Benzyl-5-tosyl-1,2,3,4-tetrahydropyridine (3l).**<sup>2</sup> Purified by silica gel column chromatography with petroleum ether/ethyl acetate (5:1, v/v) as eluent. White solid (123.7 mg, 63% yield). mp 155–157 °C. <sup>1</sup>H NMR (400 MHz, CDCl<sub>3</sub>)  $\delta$  (ppm) 7.75 (d,  $J$  = 8.3 Hz, 2H), 7.52 (s, 1H), 7.40–7.31 (m, 5H), 7.22 (d,  $J$  = 6.5 Hz, 2H), 4.32 (s, 2H), 2.98–2.95 (m, 2H), 2.43 (s, 3H), 2.18 (t,  $J$  = 6.2 Hz, 2H), 1.81–1.75 (m, 2H). <sup>13</sup>C NMR (100 MHz, CDCl<sub>3</sub>)  $\delta$  (ppm) 144.2, 142.4, 139.7, 136.5, 129.5, 128.9, 128.0, 127.5, 126.9, 101.0, 59.7, 44.9, 21.5, 21.0, 19.6.

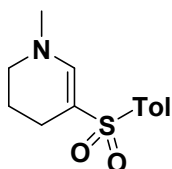

**1-Methyl-5-tosyl-1,2,3,4-tetrahydropyridine (3m).** Purified by silica gel column chromatography with petroleum ether/ethyl acetate (5:1, v/v) as eluent. White solid (93.4 mg, 62 % yield). mp 160–162 °C. <sup>1</sup>H NMR (400 MHz, CDCl<sub>3</sub>)  $\delta$  (ppm) 7.71 (d,  $J$  = 8.3 Hz, 2H), 7.28 (s, 1H), 7.26 (s, 2H), 3.03–3.00 (m, 2H), 2.96 (s, 3H), 2.41 (s, 3H), 2.15 (t,  $J$  = 6.2 Hz, 2H), 1.85–1.79 (m, 2H). <sup>13</sup>C NMR (100 MHz, CDCl<sub>3</sub>)  $\delta$  (ppm) 144.5, 142.2, 139.9, 129.4, 126.8, 100.1, 47.2, 42.7, 21.5, 21.0, 19.3. HRMS (ESI)  $m/z$ : [M + H]<sup>+</sup> Calcd for C<sub>13</sub>H<sub>18</sub>NO<sub>2</sub>S<sup>+</sup> 252.1053; Found 252.1051.

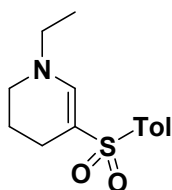

**1-Ethyl-5-tosyl-1,2,3,4-tetrahydropyridine (3n).**<sup>2</sup> Purified by silica gel column chromatography with petroleum ether/ethyl acetate (5:1, v/v) as eluent. White solid (114.5 mg, 72% yield). mp 120–122 °C. <sup>1</sup>H NMR (400 MHz, CDCl<sub>3</sub>)  $\delta$  (ppm) 7.69 (d,  $J$  = 8.3 Hz, 2H), 7.30 (s, 1H), 7.25 (d,  $J$  = 8.0 Hz, 2H), 3.18 (q,  $J$  = 7.2 Hz, 2H), 3.05–3.02 (m, 2H), 2.39 (s, 3H), 2.14 (t,  $J$  = 6.2 Hz, 2H), 1.81–1.75 (m, 2H), 1.15 (t,  $J$  = 7.2 Hz, 3H). <sup>13</sup>C NMR (100 MHz, CDCl<sub>3</sub>)  $\delta$  (ppm) 143.5, 142.2, 139.9, 129.4, 126.8, 99.6, 50.4, 44.8, 21.5, 21.1, 19.7, 13.8.

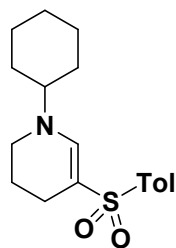

**1-Cyclohexyl-5-tosyl-1,2,3,4-tetrahydropyridine (3o).**<sup>2</sup> Purified by silica gel column chromatography with petroleum ether/ethyl acetate (5:1, v/v) as eluent. White solid (136.0 mg, 71% yield). mp 145–147 °C. <sup>1</sup>H NMR (400 MHz, CDCl<sub>3</sub>)  $\delta$  (ppm) 7.66 (d,  $J$  = 8.2 Hz, 2H), 7.35 (s, 1H), 7.22 (d,  $J$  = 7.9 Hz, 2H), 3.04–3.01 (m, 2H), 2.96–2.88 (m, 1H), 2.36 (s, 3H), 2.13 (t,  $J$  = 6.2 Hz, 2H), 1.81–1.70 (m, 6H), 1.63 (d,  $J$  = 13.1 Hz, 1H), 1.40–1.23 (m, 4H), 1.12–1.04 (m, 1H). <sup>13</sup>C NMR (100 MHz, CDCl<sub>3</sub>)  $\delta$  (ppm) 142.4, 142.0, 140.1, 129.3, 126.7, 99.0, 64.1, 43.0, 31.4, 25.6, 25.3, 21.4, 21.4, 20.3.

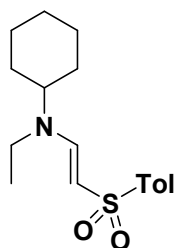

**(E)-N-Ethyl-N-(2-tosylvinyl)cyclohexanamine (3p).** Purified by silica gel column chromatography with petroleum ether/ethyl acetate (5:1, v/v) as eluent. White solid (129.0 mg, 70 % yield). mp 121–123 °C. <sup>1</sup>H NMR (400 MHz, CDCl<sub>3</sub>)  $\delta$  (ppm) 7.73 (d,  $J$  = 8.2 Hz, 2H), 7.36 (d,  $J$  = 12.6 Hz, 1H), 7.25 (d,  $J$  = 7.9 Hz, 2H), 4.88 (d,  $J$  = 12.6 Hz, 1H), 3.12–3.00 (m, 3H), 2.39 (s, 3H), 1.84–1.80 (m, 4H), 1.68–1.64 (m, 1H), 1.45–1.37 (m, 2H), 1.32–1.23 (m, 2H), 1.15–1.06 (m, 4H). <sup>13</sup>C NMR (100 MHz, CDCl<sub>3</sub>)  $\delta$  (ppm) 147.2, 142.7, 141.9, 129.4, 126.1, 91.1, 64.9, 41.8, 32.5, 25.7, 25.2, 21.4, 12.2. HRMS (ESI)  $m/z$ : [M + H]<sup>+</sup> Calcd for C<sub>17</sub>H<sub>26</sub>NO<sub>2</sub>S<sup>+</sup> 308.1679; Found 308.1679.

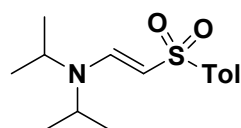

**(E)-N-Isopropyl-N-(2-tosylvinyl)propan-2-amine (3q).**<sup>3</sup> Purified by silica gel column chromatography with petroleum ether/ethyl acetate (3:1, v/v) as eluent. Colorless viscous liquid (121.5 mg, 72 % yield). <sup>1</sup>H NMR (400 MHz, CDCl<sub>3</sub>)  $\delta$  (ppm) 7.74 (d,  $J$  = 8.3 Hz, 2H), 7.40 (d,  $J$  = 12.8 Hz, 1H), 7.27 (d,  $J$  = 8.0 Hz, 2H), 4.97 (d,  $J$  = 12.8 Hz, 1H), 3.60 (s, 2H), 2.41 (s, 3H), 1.21

(s, 12H).  $^{13}\text{C}$  NMR (100 MHz,  $\text{CDCl}_3$ )  $\delta$  (ppm) 144.9, 142.7, 141.9, 129.4, 126.2, 91.7, 49.2, 47.5, 23.5, 21.5, 19.5.

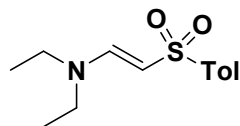

**(*E*)-*N,N*-Diethyl-2-tosylethen-1-amine (3r).**<sup>4</sup> Purified by silica gel column chromatography with petroleum ether/ethyl acetate (3:1, v/v) as eluent. Colorless viscous liquid (110.9 mg, 73% yield).  $^1\text{H}$  NMR (400 MHz,  $\text{CDCl}_3$ )  $\delta$  (ppm) 7.73 (d,  $J$  = 7.9 Hz, 2H), 7.31–7.25 (m, 3H), 4.89 (d,  $J$  = 12.7 Hz, 1H), 3.22–3.11 (m, 4H), 2.40 (s, 3H), 1.15 (s, 6H).  $^{13}\text{C}$  NMR (100 MHz,  $\text{CDCl}_3$ )  $\delta$  (ppm) 148.8, 142.5, 142.0, 129.4, 126.1, 91.6, 50.0, 42.6, 21.5, 14.7, 11.1.

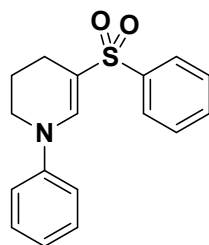

**1-Phenyl-5-(phenylsulfonyl)-1,2,3,4-tetrahydropyridine (4a).**<sup>1</sup> Purified by silica gel column chromatography with petroleum ether/ethyl acetate (5:1, v/v) as eluent. White solid (131.0 mg, 73% yield). mp 146–148 °C.  $^1\text{H}$  NMR (400 MHz,  $\text{CDCl}_3$ )  $\delta$  (ppm) 7.89–7.87 (m, 3H), 7.57–7.48 (m, 3H), 7.36 (t,  $J$  = 8.0 Hz, 2H), 7.10 (t,  $J$  = 7.6 Hz, 3H), 3.57–3.55 (m, 2H), 2.29 (t,  $J$  = 6.2 Hz, 2H), 2.00–1.95 (m, 2H).  $^{13}\text{C}$  NMR (100 MHz,  $\text{CDCl}_3$ )  $\delta$  (ppm) 145.3, 141.9, 139.5, 132.2, 129.5, 129.0, 127.1, 123.5, 117.8, 107.6, 45.9, 21.1, 20.0.

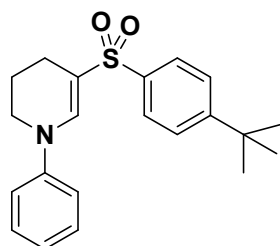

**5-((4-(*tert*-Butyl)Phenyl)sulfonyl)-1-phenyl-1,2,3,4-tetrahydropyridine (4b).**<sup>1</sup> Purified by silica gel column chromatography with petroleum ether/ethyl acetate (5:1, v/v) as eluent. Yellow viscous liquid (153.4 mg, 72% yield).  $^1\text{H}$  NMR (400 MHz,  $\text{CDCl}_3$ )  $\delta$  (ppm) 7.87 (s, 1H), 7.80 (d,  $J$  = 8.6 Hz, 2H), 7.51 (d,  $J$  = 8.6 Hz, 2H), 7.35–7.31 (m, 2H), 7.06 (dd,  $J$  = 7.9, 6.1 Hz, 3H), 3.56–3.53 (m, 2H), 2.30 (t,  $J$  = 6.3 Hz, 2H), 2.00–1.94 (m, 2H), 1.34 (s, 9H).  $^{13}\text{C}$  NMR (100 MHz,  $\text{CDCl}_3$ )  $\delta$  (ppm) 155.8, 145.4, 139.1, 138.9, 129.5, 126.9, 126.0, 123.3, 117.7, 108.0, 45.8, 35.1,

31.2, 21.2, 20.0.

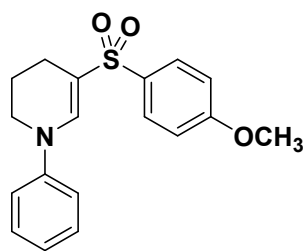

**5-((4-Methoxyphenyl)sulfonyl)-1-phenyl-1,2,3,4-tetrahydropyridine (4c).**<sup>1</sup> Purified by silica gel column chromatography with petroleum ether/ethyl acetate (2:1, v/v) as eluent. Yellow viscous liquid (138.2 mg, 70% yield). <sup>1</sup>H NMR (400 MHz, CDCl<sub>3</sub>)  $\delta$  (ppm) 7.85 (s, 1H), 7.81 (t,  $J$  = 8.7 Hz, 2H), 7.34 (t,  $J$  = 7.8 Hz, 2H), 7.07 (d,  $J$  = 8.9 Hz, 3H), 6.97 (d,  $J$  = 8.6 Hz, 2H), 3.85 (s, 3H), 3.54 (t,  $J$  = 5.5 Hz, 2H), 2.27 (t,  $J$  = 6.2 Hz, 2H), 1.99–1.94 (m, 2H). <sup>13</sup>C NMR (100 MHz, CDCl<sub>3</sub>)  $\delta$  (ppm) 162.6, 145.4, 138.6, 133.5, 129.5, 129.2, 123.3, 117.6, 114.2, 108.4, 55.7, 45.8, 21.1, 20.0.

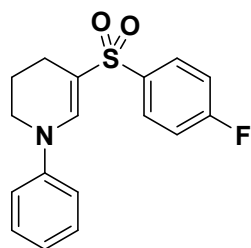

**5-((4-Fluorophenyl)sulfonyl)-1-phenyl-1,2,3,4-tetrahydropyridine (4d).**<sup>1</sup> Purified by silica gel column chromatography with petroleum ether/ethyl acetate (4:1, v/v) as eluent. White solid (138.9 mg, 73% yield). mp 153–155 °C. <sup>1</sup>H NMR (400 MHz, CDCl<sub>3</sub>)  $\delta$  (ppm) 7.91–7.87 (m, 3H), 7.38–7.34 (m, 2H), 7.17 (t,  $J$  = 8.6 Hz, 2H), 7.12–7.08 (m, 3H), 3.59–3.56 (m, 2H), 2.28 (t,  $J$  = 6.0 Hz, 2H), 2.02–1.97 (m, 2H). <sup>13</sup>C NMR (100 MHz, CDCl<sub>3</sub>)  $\delta$  (ppm) 164.9 (d,  $J$  = 253.7 Hz), 145.3, 139.6, 138.1 (d,  $J$  = 3.1 Hz), 129.8 (d,  $J$  = 9.2 Hz), 129.5, 123.6, 117.9, 116.1 (d,  $J$  = 22.4 Hz), 107.3, 45.9, 21.1, 20.0.

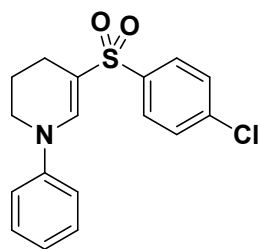

**5-((4-Chlorophenyl)sulfonyl)-1-phenyl-1,2,3,4-tetrahydropyridine (4e).**<sup>1</sup> Purified by silica gel column chromatography with petroleum ether/ethyl acetate (4:1, v/v) as eluent. White solid (143.9

mg, 72% yield). mp 122–124 °C.  $^1\text{H}$  NMR (400 MHz,  $\text{CDCl}_3$ )  $\delta$  (ppm) 7.87–7.81 (m, 3H), 7.47 (d,  $J = 8.4$  Hz, 2H), 7.37 (t,  $J = 7.7$  Hz, 2H), 7.10 (t,  $J = 6.1$  Hz, 3H), 3.58 (t,  $J = 5.6$  Hz, 2H), 2.29 (t,  $J = 6.2$  Hz, 2H), 2.02–1.97 (m, 2H).  $^{13}\text{C}$  NMR (100 MHz,  $\text{CDCl}_3$ )  $\delta$  (ppm) 145.2, 140.6, 139.9, 138.6, 129.6, 129.2, 128.6, 123.7, 117.9, 107.0, 46.0, 21.1, 20.0.

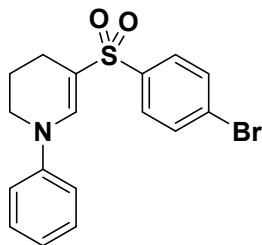

**5-((4-Bromophenyl)sulfonyl)-1-phenyl-1,2,3,4-tetrahydropyridine (4f).** Purified by silica gel column chromatography with petroleum ether/ethyl acetate (4:1, v/v) as eluent. White solid (160.6 mg, 71% yield). mp 154–156 °C.  $^1\text{H}$  NMR (400 MHz,  $\text{CDCl}_3$ )  $\delta$  (ppm) 7.86 (s, 1H), 7.76–7.72 (m, 2H), 7.64–7.61 (m, 2H), 7.36 (dd,  $J = 8.6, 7.3$  Hz, 2H), 7.12–7.07 (m, 3H), 3.58–3.55 (m, 2H), 2.28 (t,  $J = 6.2$  Hz, 2H), 2.01–1.95 (m, 2H).  $^{13}\text{C}$  NMR (100 MHz,  $\text{CDCl}_3$ )  $\delta$  (ppm) 145.2, 141.1, 139.9, 132.2, 129.6, 128.7, 127.1, 123.7, 117.9, 106.9, 46.0, 21.1, 20.0. HRMS (ESI)  $m/z$ :  $[\text{M} + \text{H}]^+$  Calcd for  $\text{C}_{17}\text{H}_{17}\text{BrNO}_2\text{S}^+$  378.0158; Found 378.0157.

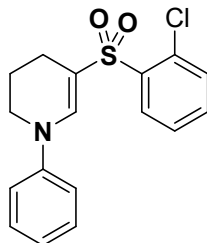

**5-((2-Chlorophenyl)sulfonyl)-1-phenyl-1,2,3,4-tetrahydropyridine (4g).** Purified by silica gel column chromatography with petroleum ether/ethyl acetate (5:1, v/v) as eluent. White solid (143.88 mg, 72% yield). mp 150–152 °C.  $^1\text{H}$  NMR (400 MHz,  $\text{CDCl}_3$ )  $\delta$  (ppm) 7.89 (dd,  $J = 4.0, 2.8$  Hz, 2H), 7.56–7.50 (m, 3H), 7.40–7.36 (m, 2H), 7.13–7.09 (m, 3H), 3.60–3.57 (m, 2H), 2.31 (t,  $J = 6.2$  Hz, 2H), 2.03–1.97 (m, 2H).  $^{13}\text{C}$  NMR (100 MHz,  $\text{CDCl}_3$ )  $\delta$  (ppm) 145.3, 141.9, 139.5, 132.2, 129.5, 129.0, 127.1, 123.5, 118.1, 117.8, 107.6, 45.9, 21.1, 20.0. HRMS (ESI)  $m/z$ :  $[\text{M} + \text{H}]^+$  Calcd for  $\text{C}_{17}\text{H}_{17}\text{ClNO}_2\text{S}^+$  334.0663; Found 334.0662.

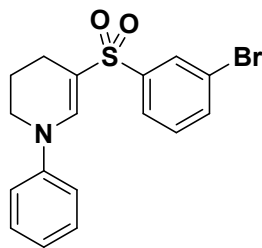

**5-((3-Bromophenyl)sulfonyl)-1-phenyl-1,2,3,4-tetrahydropyridine (4h).** Purified by silica gel column chromatography with petroleum ether/ethyl acetate (5:1, v/v) as eluent. White solid (156.1 mg, 69% yield). mp 154–156 °C. <sup>1</sup>H NMR (400 MHz, CDCl<sub>3</sub>)  $\delta$  (ppm) 8.01 (s, 1H), 7.87–7.79 (m, 2H), 7.66 (d,  $J$  = 7.4 Hz, 1H), 7.40–7.35 (m, 3H), 7.10 (dd,  $J$  = 7.7, 4.3 Hz, 3H), 3.60–3.57 (m, 2H), 2.30 (t,  $J$  = 6.2 Hz, 2H), 2.03–1.97 (m, 2H). <sup>13</sup>C NMR (100 MHz, CDCl<sub>3</sub>)  $\delta$  (ppm) 145.2, 144.0, 140.2, 135.2, 130.6, 129.9, 129.6, 125.7, 123.8, 123.0, 118.0, 106.6, 46.0, 21.1, 20.0. HRMS (ESI)  $m/z$ : [M + H]<sup>+</sup> Calcd for C<sub>17</sub>H<sub>17</sub>BrNO<sub>2</sub>S<sup>+</sup> 378.0158; Found 378.0159.

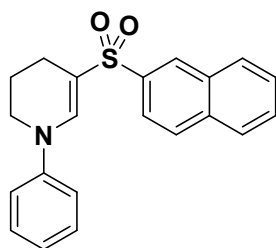

**5-(Naphthalen-2-ylsulfonyl)-1-phenyl-1,2,3,4-tetrahydropyridine (4i).**<sup>1</sup> Purified by silica gel column chromatography with petroleum ether/ethyl acetate (5:1, v/v) as eluent. White solid (134.1 mg, 64% yield). mp 140–142 °C. <sup>1</sup>H NMR (400 MHz, CDCl<sub>3</sub>)  $\delta$  (ppm) 8.49 (d,  $J$  = 1.8 Hz, 1H), 8.00–7.84 (m, 5H), 7.66–7.59 (m, 2H), 7.40–7.36 (m, 2H), 7.14–7.10 (m, 3H), 3.58–3.55 (m, 2H), 2.35–2.32 (m, 2H), 2.00–1.95 (m, 2H). <sup>13</sup>C NMR (100 MHz, CDCl<sub>3</sub>)  $\delta$  (ppm) 145.3, 139.6, 138.7, 134.7, 132.3, 129.6, 129.3, 129.3, 128.6, 128.3, 127.9, 127.4, 123.5, 122.7, 117.8, 107.6, 45.9, 21.2, 20.1.

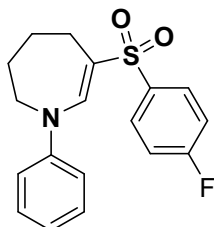

**6-((4-Fluorophenyl)sulfonyl)-1-phenyl-2,3,4,5-tetrahydro-1H-azepine (4j).** Purified by silica gel column chromatography with petroleum ether/ethyl acetate (5:1, v/v) as eluent. Light yellow solid (130.7 mg, 70% yield). mp 142–144 °C. <sup>1</sup>H NMR (400 MHz, CDCl<sub>3</sub>)  $\delta$  (ppm) 7.91–7.88 (m,

2H), 7.81 (d,  $J = 5.5$  Hz, 1H), 7.36 (t,  $J = 7.7$  Hz, 2H), 7.21–7.12 (m, 5H), 3.85–3.82 (m, 2H), 2.48–2.45 (m, 2H), 1.92–1.86 (m, 2H), 1.82–1.76 (m, 2H).  $^{13}\text{C}$  NMR (100 MHz,  $\text{CDCl}_3$ )  $\delta$  (ppm) 164.9 (d,  $J = 253.8$  Hz), 147.4, 145.1, 138.1 (d,  $J = 3.2$  Hz), 129.9 (d,  $J = 9.3$  Hz), 129.5, 124.2, 119.9, 116.1 (d,  $J = 22.6$  Hz), 112.7, 51.9, 28.0, 26.0, 25.6. HRMS (ESI)  $m/z$ :  $[\text{M} + \text{H}]^+$  Calcd for  $\text{C}_{18}\text{H}_{19}\text{FNO}_2\text{S}^+$  332.1115; Found 332.1115.

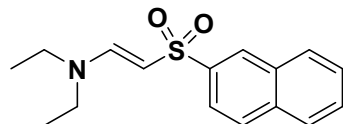

**(*E*)-*N,N*-Diethyl-2-(naphthalen-2-ylsulfonyl)ethen-1-amine (4k).**<sup>4</sup> Purified by silica gel column chromatography with petroleum ether/ethyl acetate (3:1, v/v) as eluent. White solid (123.2 mg, 64% yield). mp 124–125 °C.  $^1\text{H}$  NMR (400 MHz,  $\text{CDCl}_3$ )  $\delta$  (ppm) 8.41 (s, 1H), 7.89–7.80 (m, 4H), 7.55–7.48 (m, 2H), 7.35 (dd,  $J = 12.7, 2.2$  Hz, 1H), 4.94 (dd,  $J = 12.7, 1.8$  Hz, 1H), 3.17–3.03 (m, 4H), 1.10–1.06 (m, 6H).  $^{13}\text{C}$  NMR (100 MHz,  $\text{CDCl}_3$ )  $\delta$  (ppm) 149.2, 142.3, 134.3, 132.3, 129.1, 129.1, 128.2, 127.8, 127.2, 126.4, 122.4, 91.1, 50.1, 42.7, 14.7, 11.1.

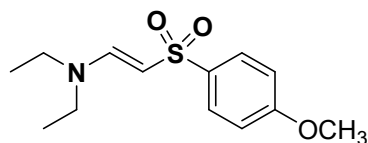

**(*E*)-*N,N*-Diethyl-2-((4-methoxyphenyl)sulfonyl)ethen-1-amine (4l).**<sup>4</sup> Purified by silica gel column chromatography with petroleum ether/ethyl acetate (2:1, v/v) as eluent. Colorless viscous liquid (113.0 mg, 70% yield).  $^1\text{H}$  NMR (400 MHz,  $\text{CDCl}_3$ )  $\delta$  (ppm) 7.81–7.77 (m, 2H), 7.32 (s, 1H), 6.97–6.92 (m, 2H), 4.90 (d,  $J = 12.7$  Hz, 1H), 3.85 (s, 3H), 3.18 (s, 4H), 1.16 (s, 6H).  $^{13}\text{C}$  NMR (100 MHz,  $\text{CDCl}_3$ )  $\delta$  (ppm) 162.0, 148.5, 137.3, 128.2, 113.9, 92.1, 55.5, 50.1, 42.7, 14.7, 11.2.

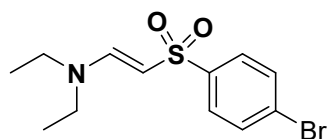

**(*E*)-2-((4-Bromophenyl)sulfonyl)-*N,N*-diethylethen-1-amine (4m).**<sup>4</sup> Purified by silica gel column chromatography with petroleum ether/ethyl acetate (3:1, v/v) as eluent. White solid (135.0 mg, 71% yield). mp 75–76 °C.  $^1\text{H}$  NMR (400 MHz,  $\text{CDCl}_3$ )  $\delta$  (ppm) 7.73–7.70 (m, 2H), 7.60–7.57 (m, 2H), 7.30 (d,  $J = 12.5$  Hz, 1H), 4.87 (d,  $J = 12.7$  Hz, 1H), 3.25–3.11 (m, 4H), 1.18–1.13 (m, 6H).  $^{13}\text{C}$  NMR (100 MHz,  $\text{CDCl}_3$ )  $\delta$  (ppm) 149.3, 144.5, 132.0, 127.8, 126.1, 90.8, 50.2, 42.8,

14.8, 11.1.

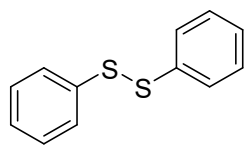

**1,2-Diphenyldisulfane (D).**<sup>5</sup> Purified by silica gel column chromatography with petroleum ether/ethyl acetate (100:1, v/v) as eluent. Light yellow solid (20.1 mg, 92% yield). mp 58–60 °C.

<sup>1</sup>H NMR (400 MHz, CDCl<sub>3</sub>)  $\delta$  (ppm) 7.75–7.72 (m, 4H), 7.49–7.45 (m, 4H), 7.41–7.37 (m, 2H).

<sup>13</sup>C NMR (100 MHz, CDCl<sub>3</sub>)  $\delta$  (ppm) 137.3, 129.4, 127.7, 127.4.

## 5 References

(1) X. Rong, J. Guo, Z. Hu, L. Huang, Y. Gu, Y. Cai, G. Liang and Q. Xia, *Eur. J. Org. Chem.*, 2021, 701–708.

(2) R. J. Griffiths, W. C. Kong, S. A. Richards, G. A. Burley, M. C. Willis and E. P. A. Talbot, *Chem. Sci.*, 2018, **9**, 2295–2300.

(3) H.-S. Kim and S. Lee, *Eur. J. Org. Chem.*, 2019, 6951–6955.

(4) H. Jiang, X. Tang, Z. Xu, H. Wang, K. Han, X. Yang, Y. Zhou, Y.-L. Feng, X.-Y. Yu and Q. Gui, *Org. Biomol. Chem.*, 2019, **17**, 2715–2720.

(5) H. Li, C. Tao, Y. Xie, A. Wang, Y. Chang, H. Yu, S. Yu and Y. Wei, *Green Chem.*, 2021, **23**, 6059–6064.

## 6 $^1\text{H}$ and $^{13}\text{C}$ NMR spectra of the products

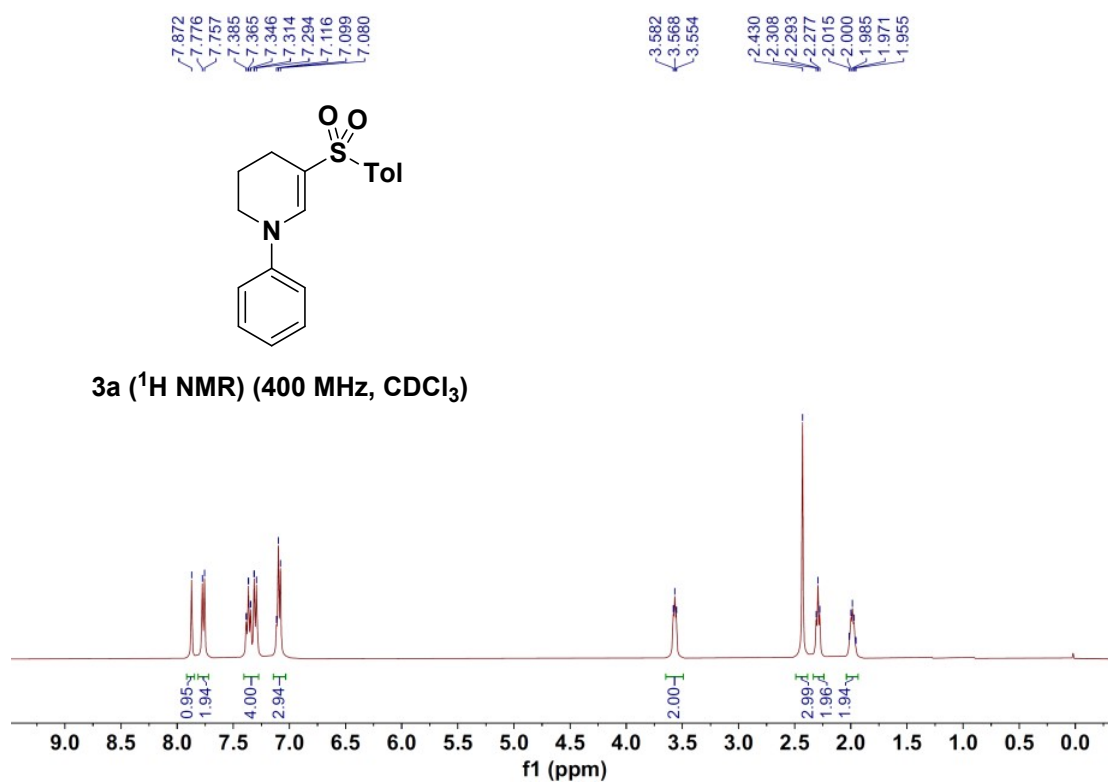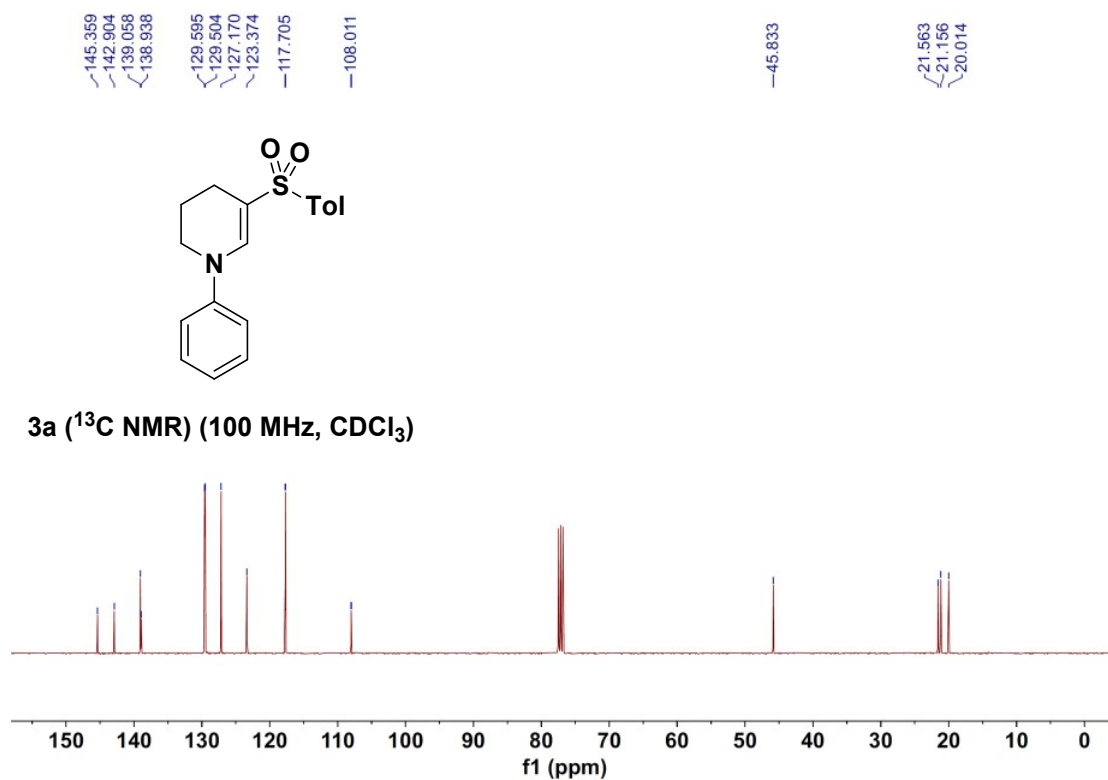

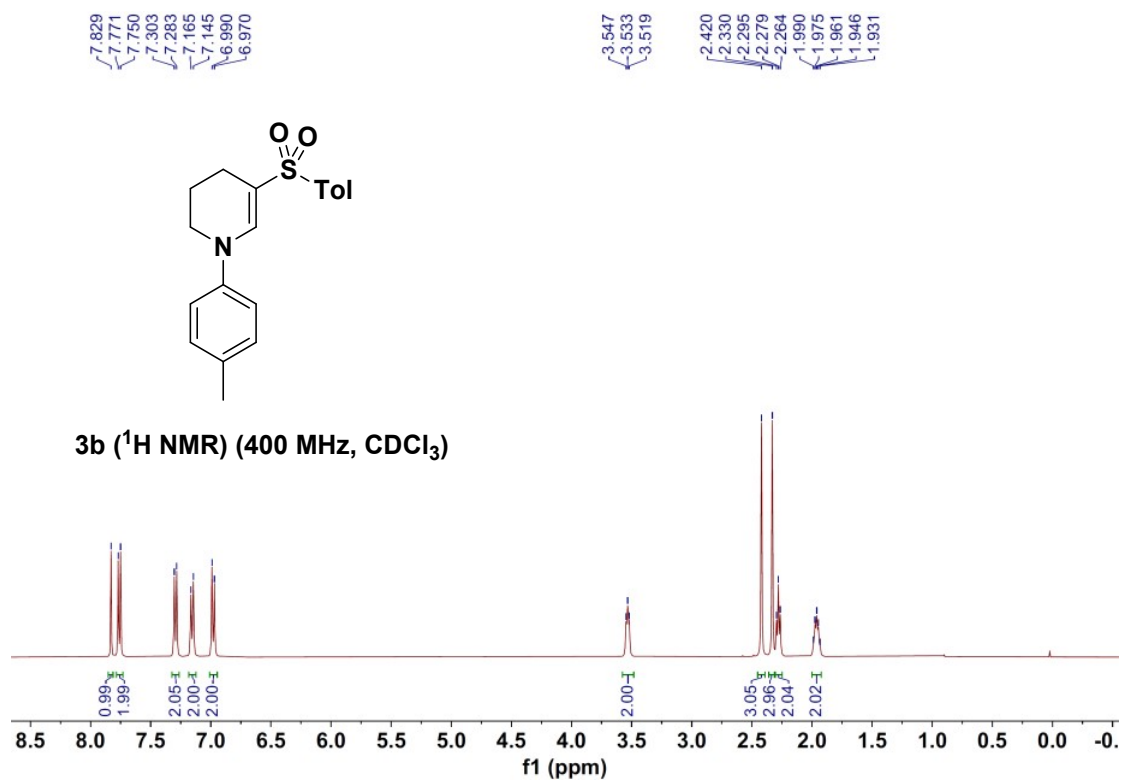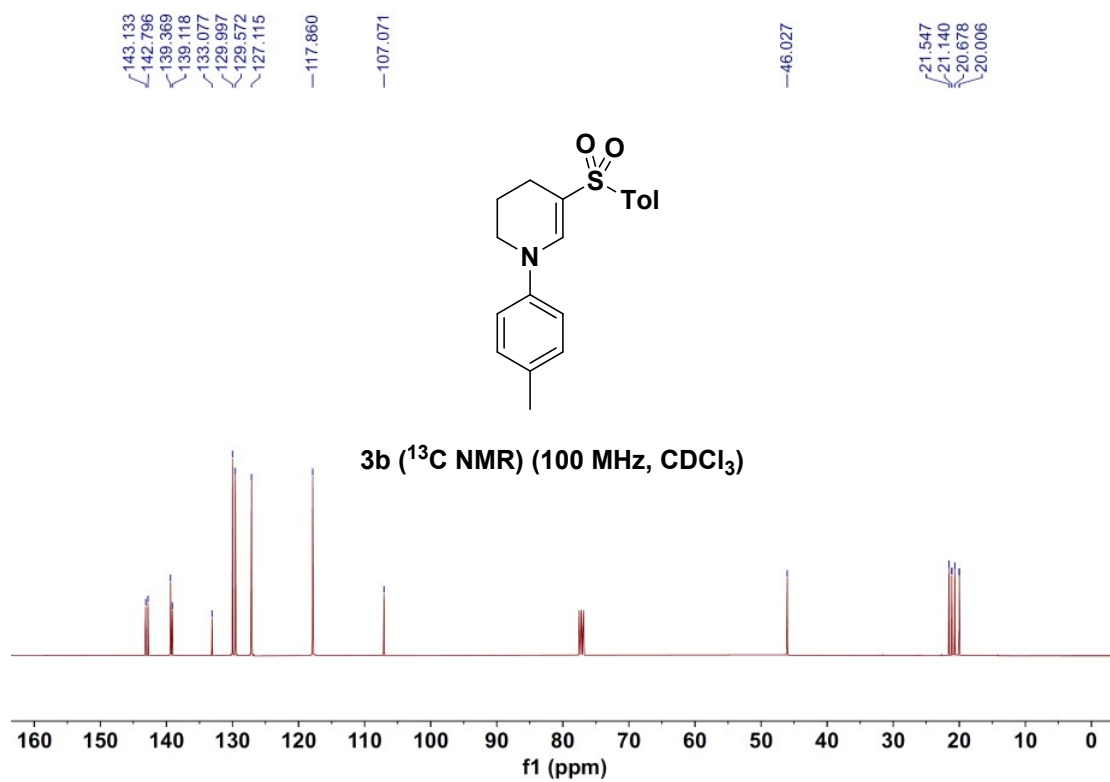

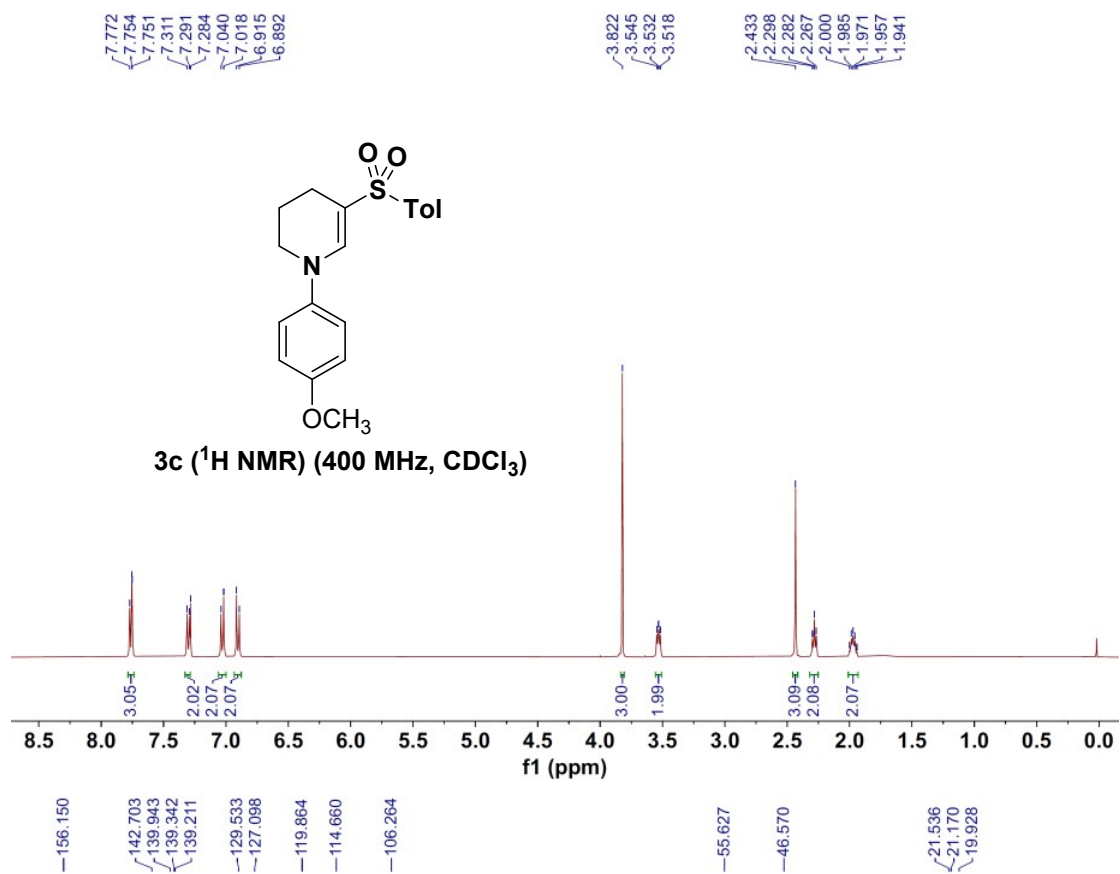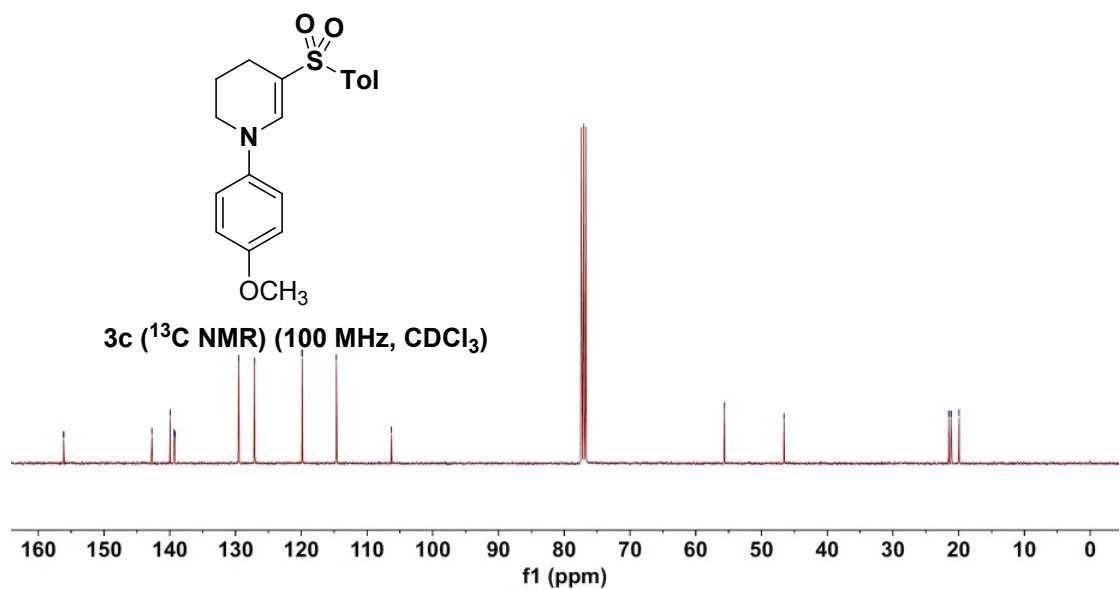

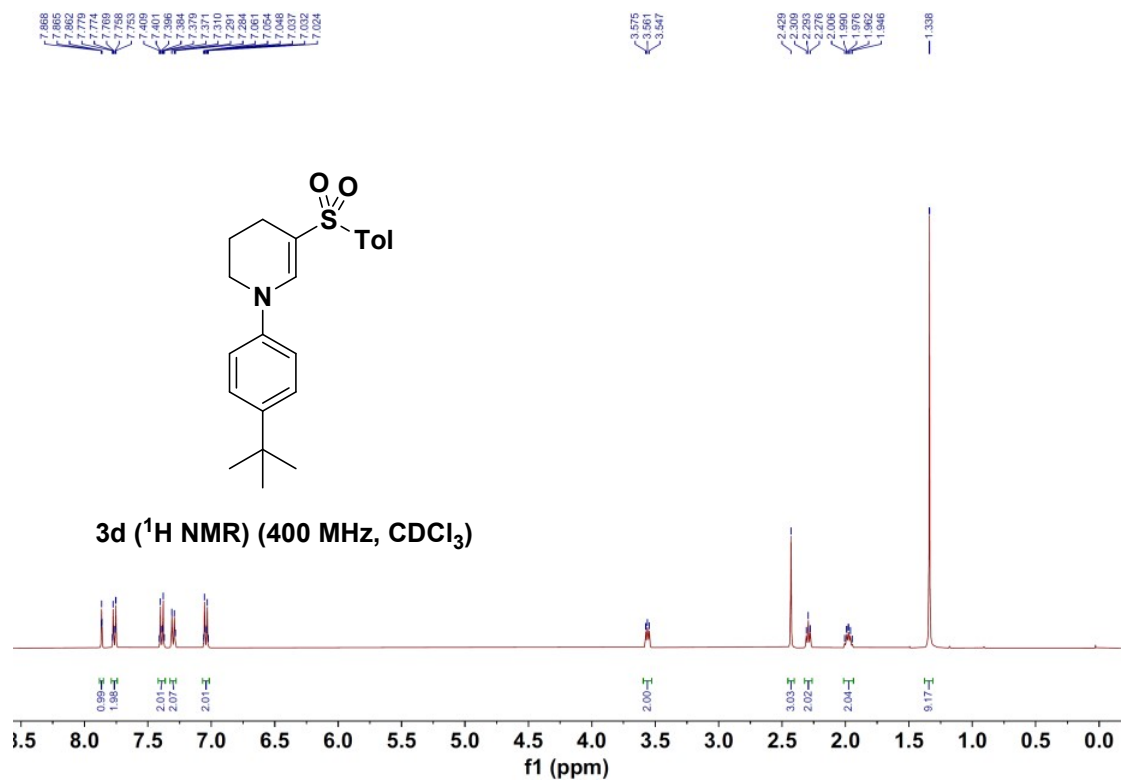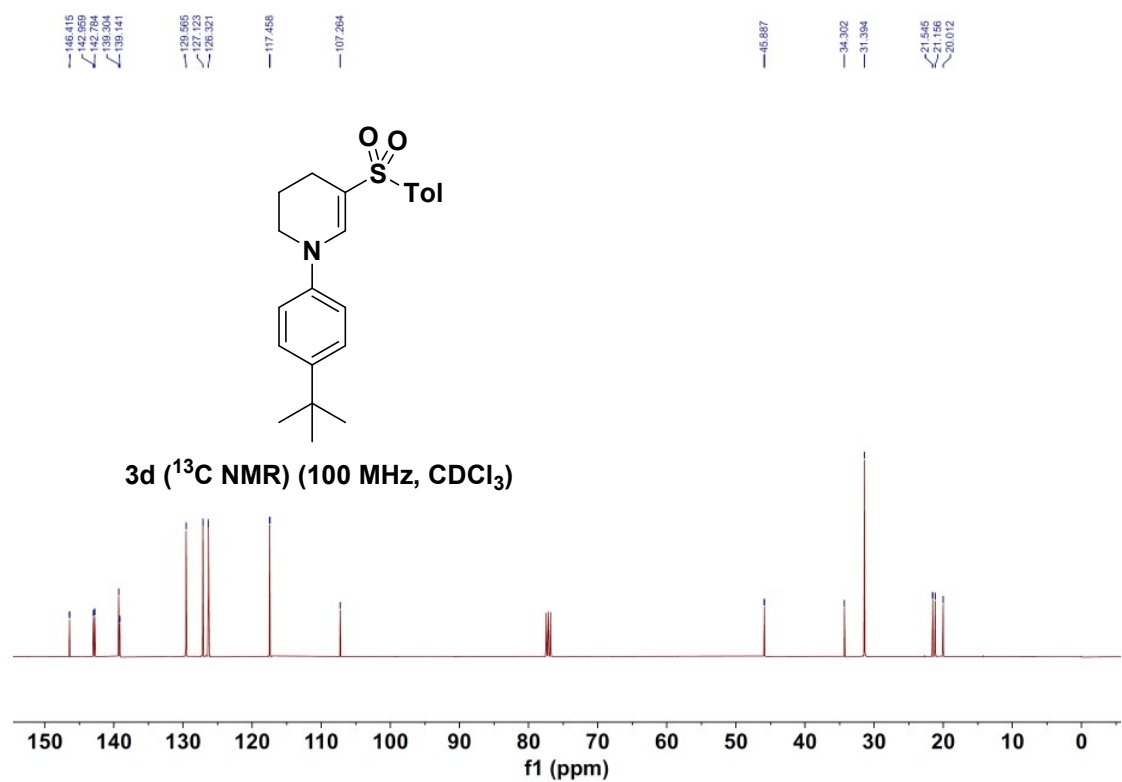

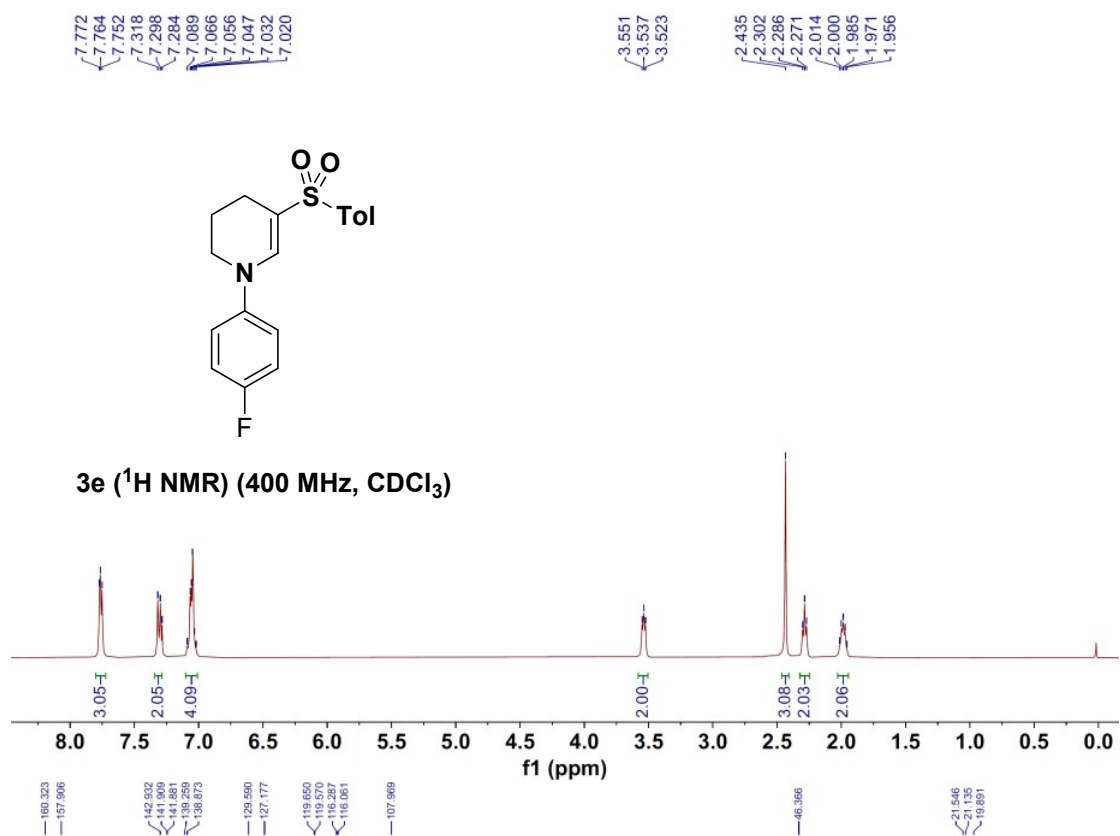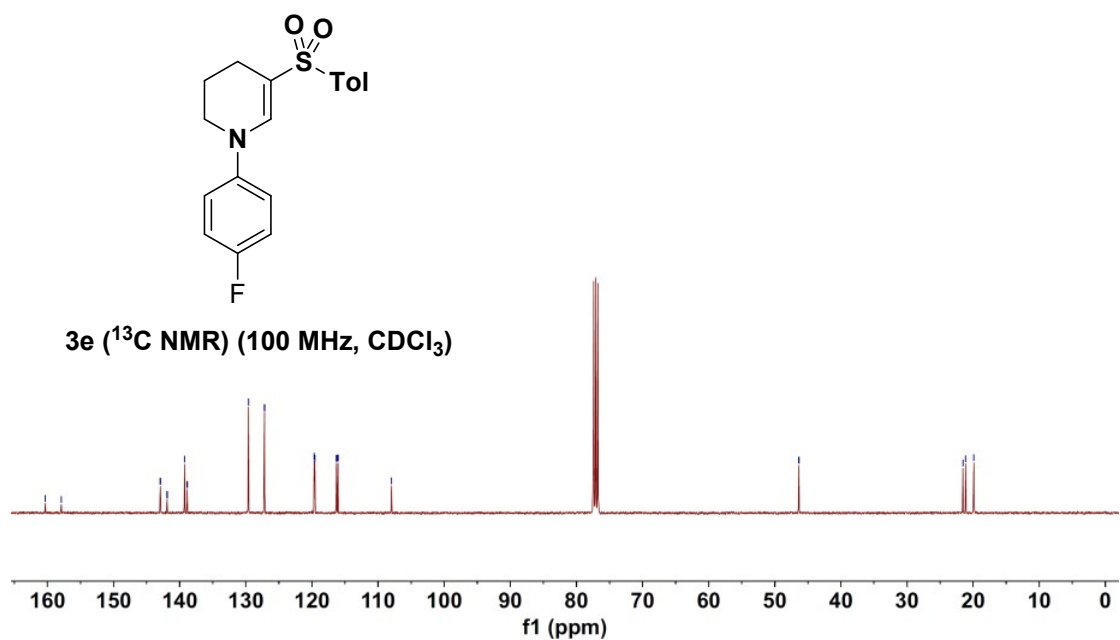

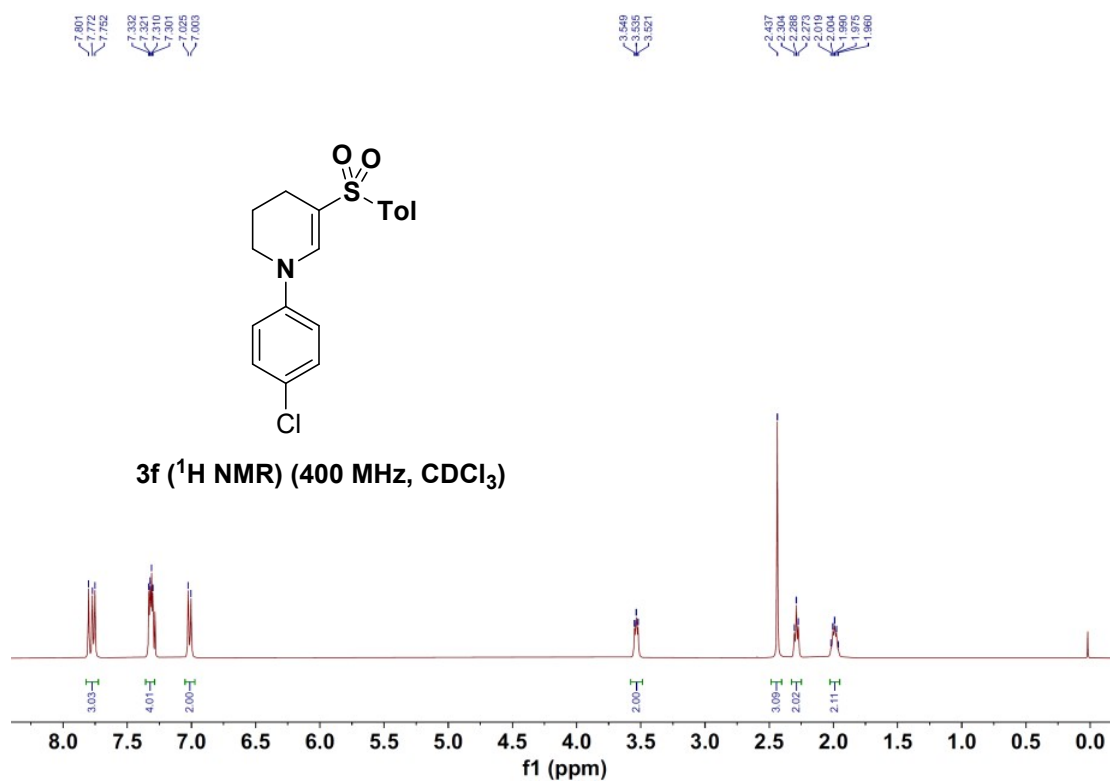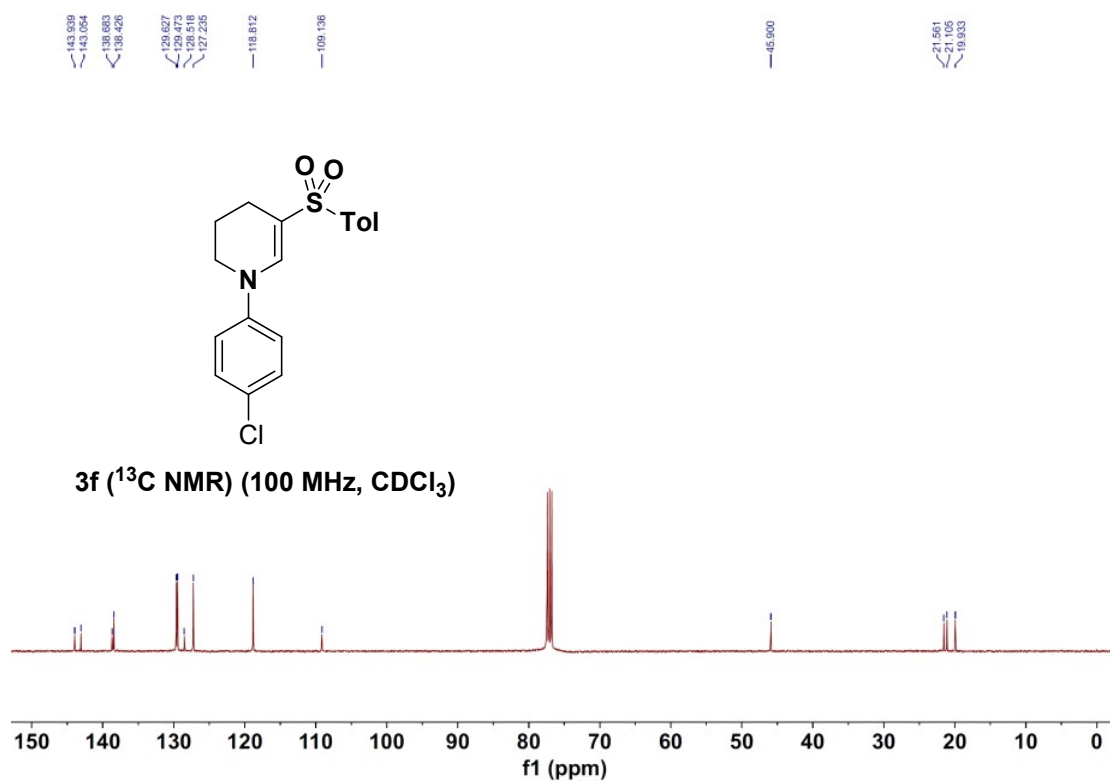

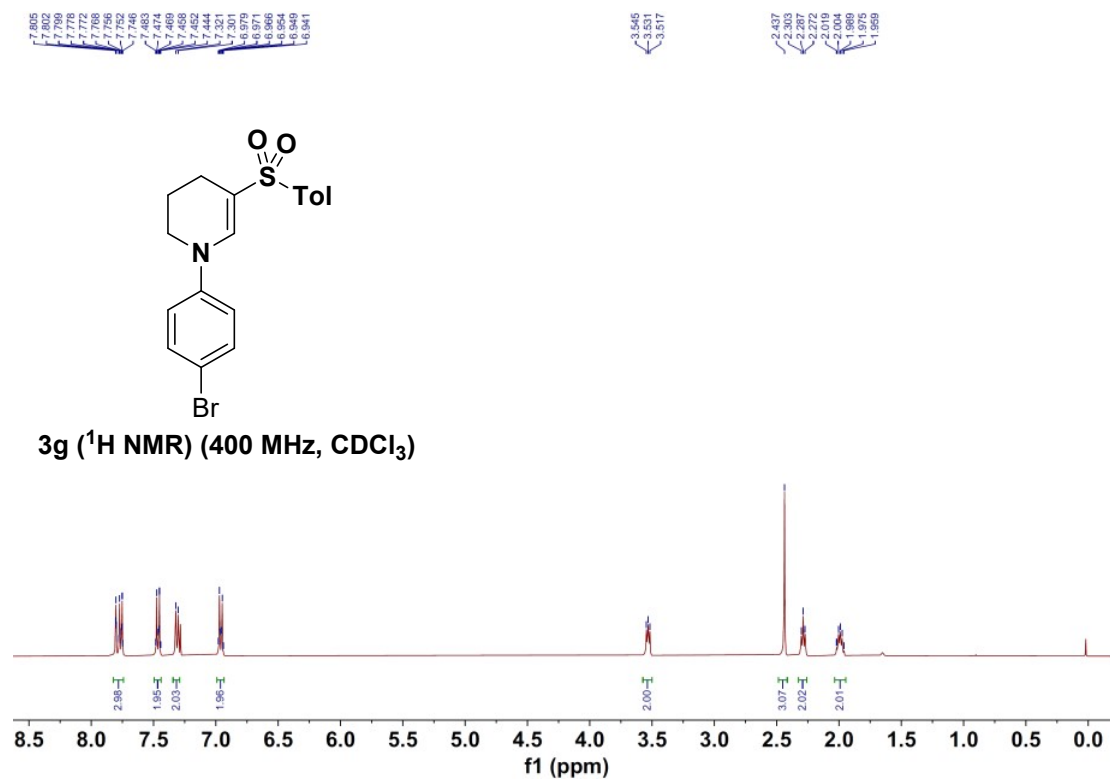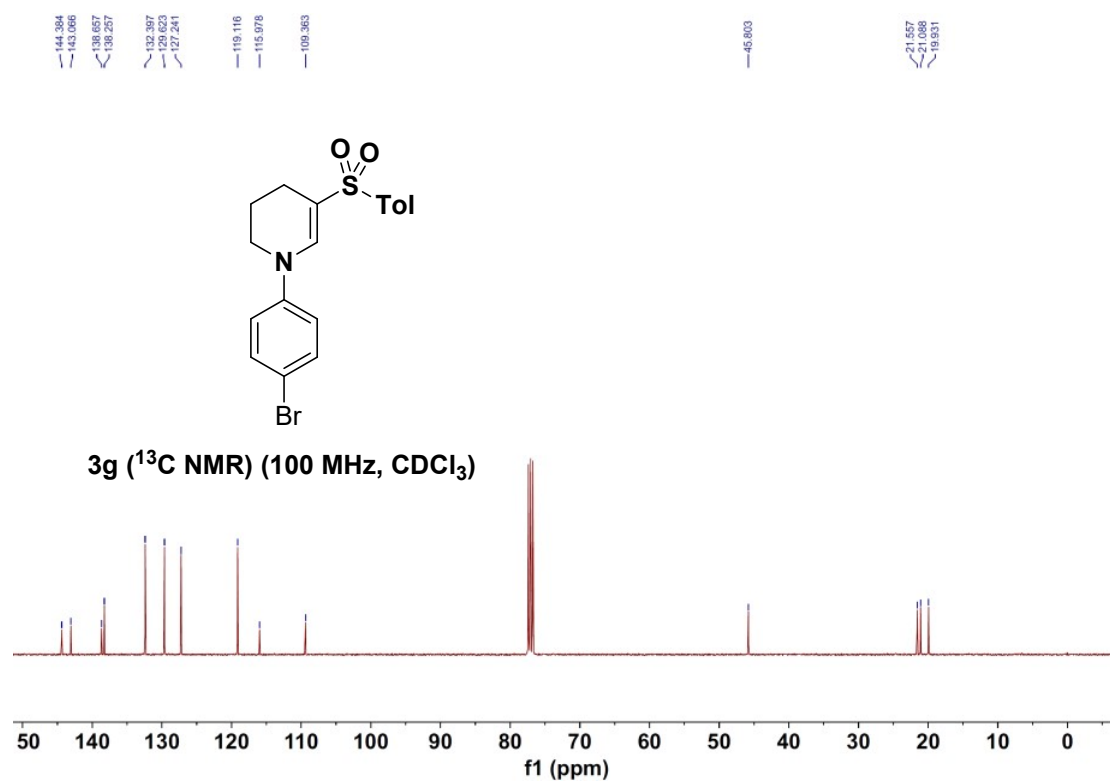

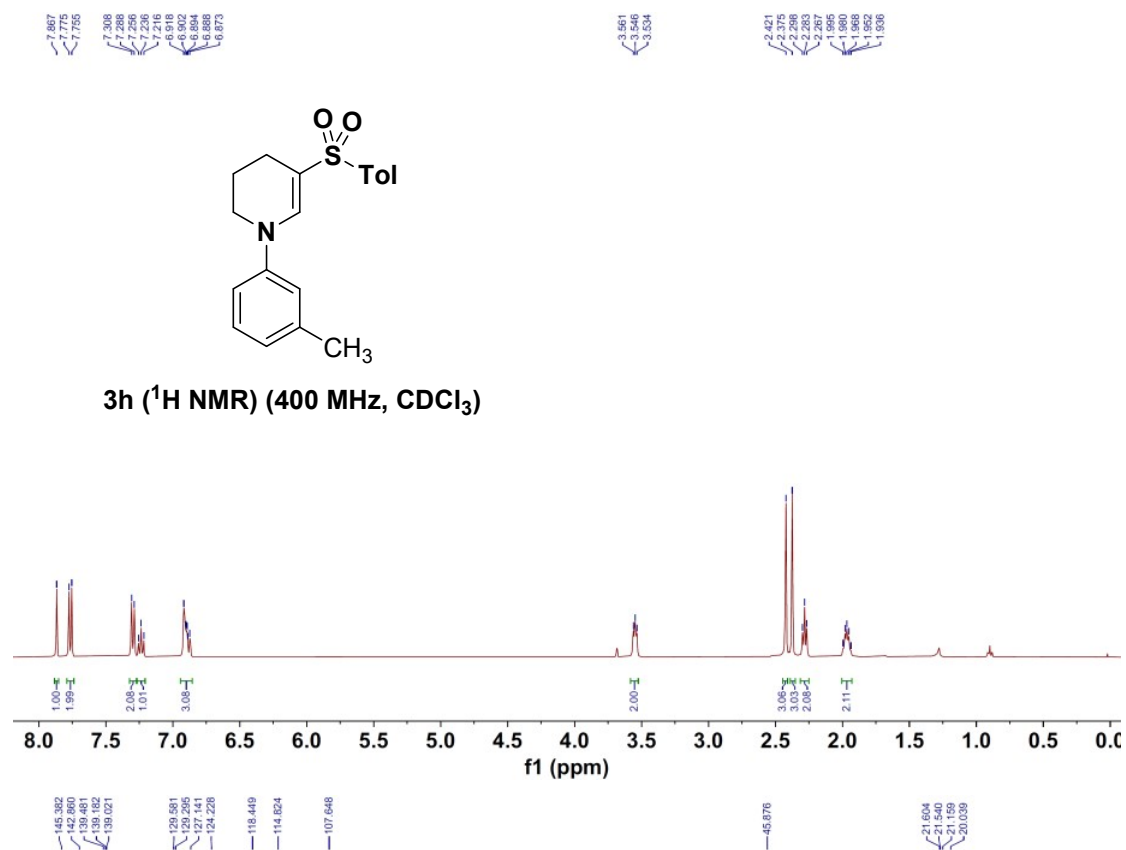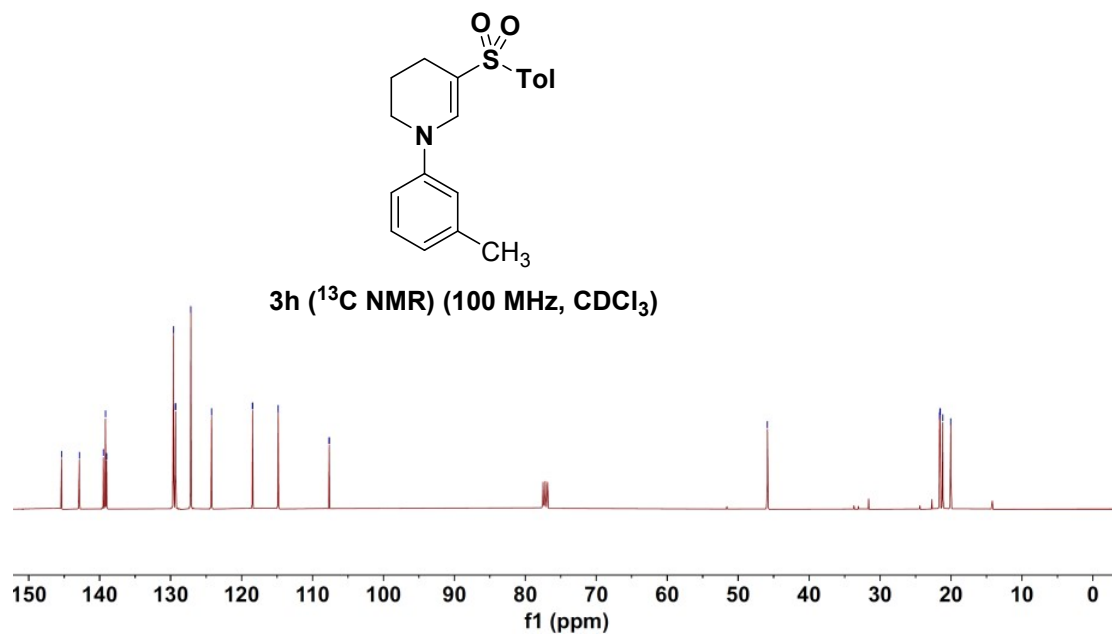

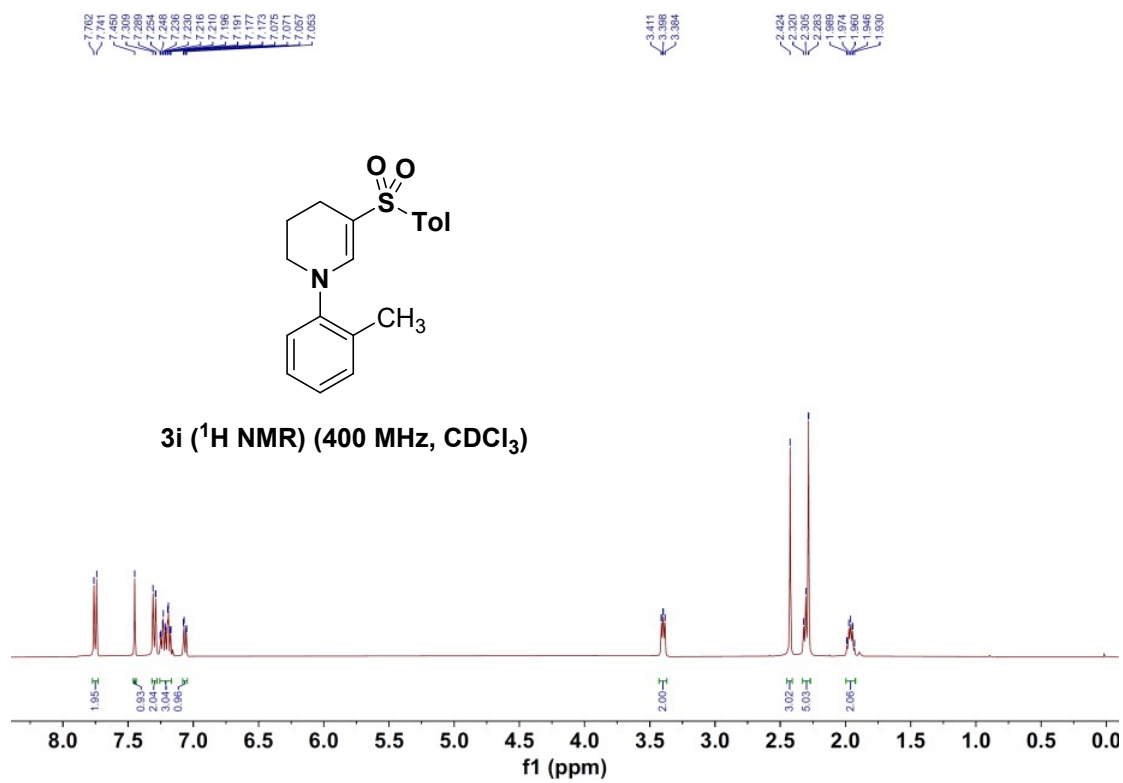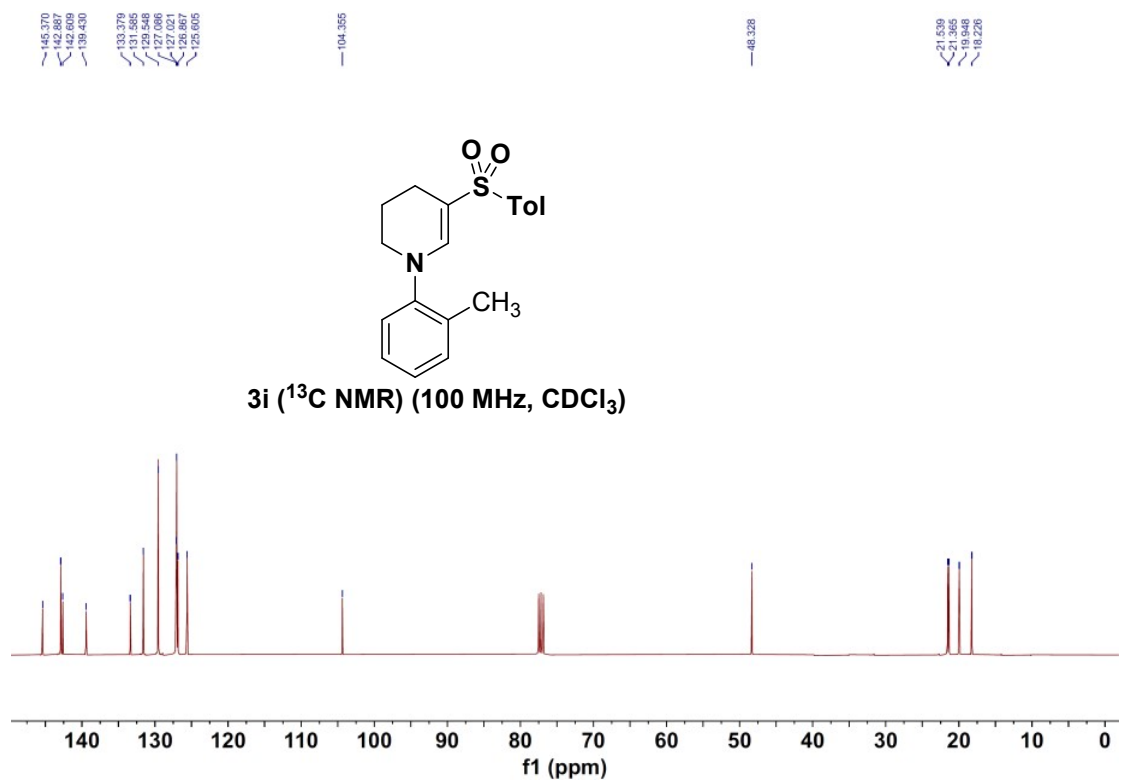

7.787  
7.772  
7.752  
7.582  
7.522  
7.332  
7.311  
7.291  
7.119  
7.103

3.895  
3.810  
3.796

2.472  
2.456  
2.443  
2.417  
1.882  
1.861  
1.850  
1.845  
1.825  
1.791  
1.774  
1.761  
1.745  
1.731

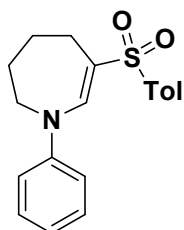

**3j** ( $^1\text{H}$  NMR) (400 MHz,  $\text{CDCl}_3$ )

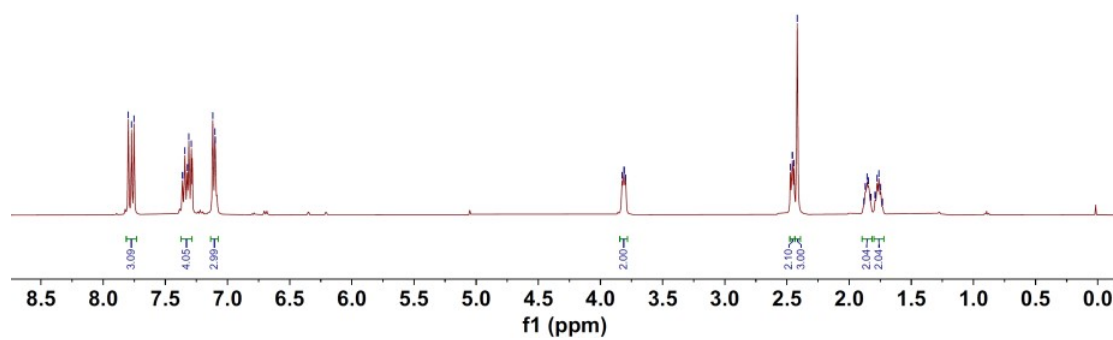

147.330  
144.602  
142.905  
138.963  
129.600  
129.443  
127.266  
123.946  
119.656  
113.578

51.674

29.647  
28.986  
25.581  
21.558

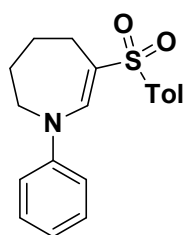

**3j** ( $^{13}\text{C}$  NMR) (100 MHz,  $\text{CDCl}_3$ )

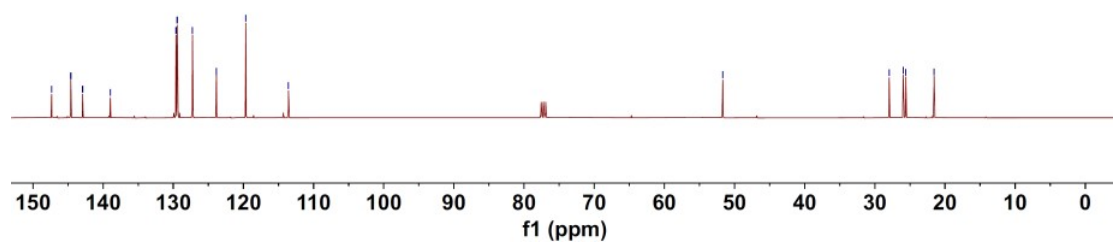

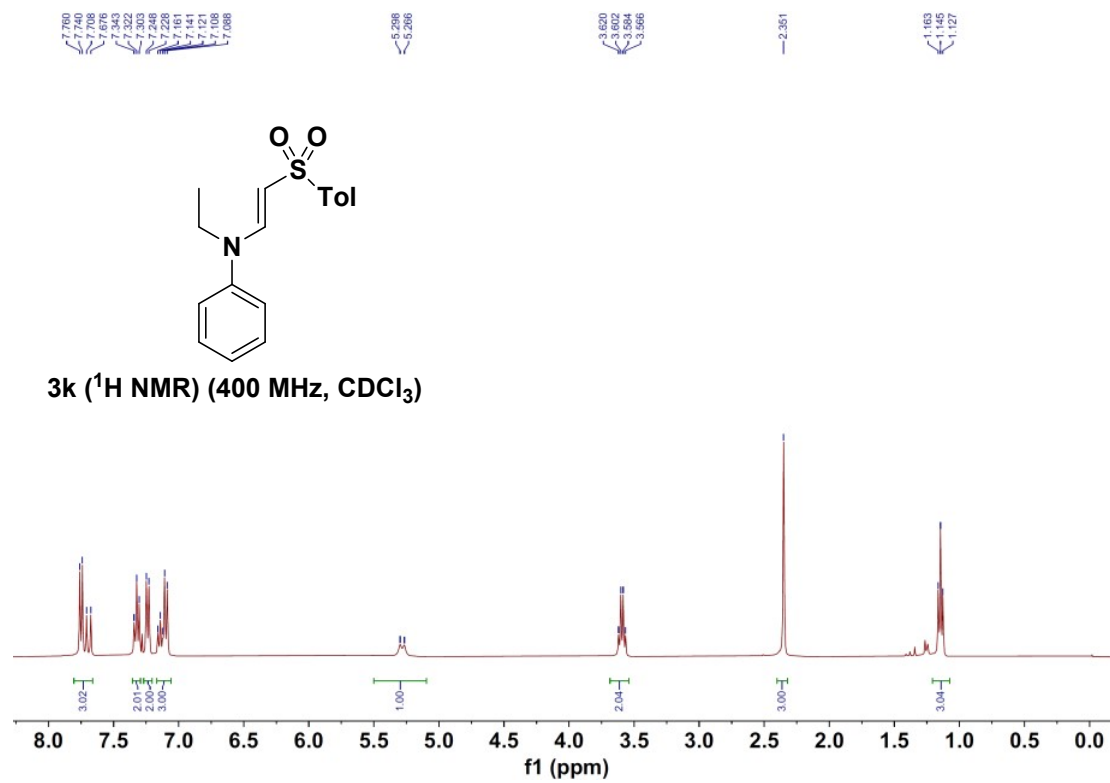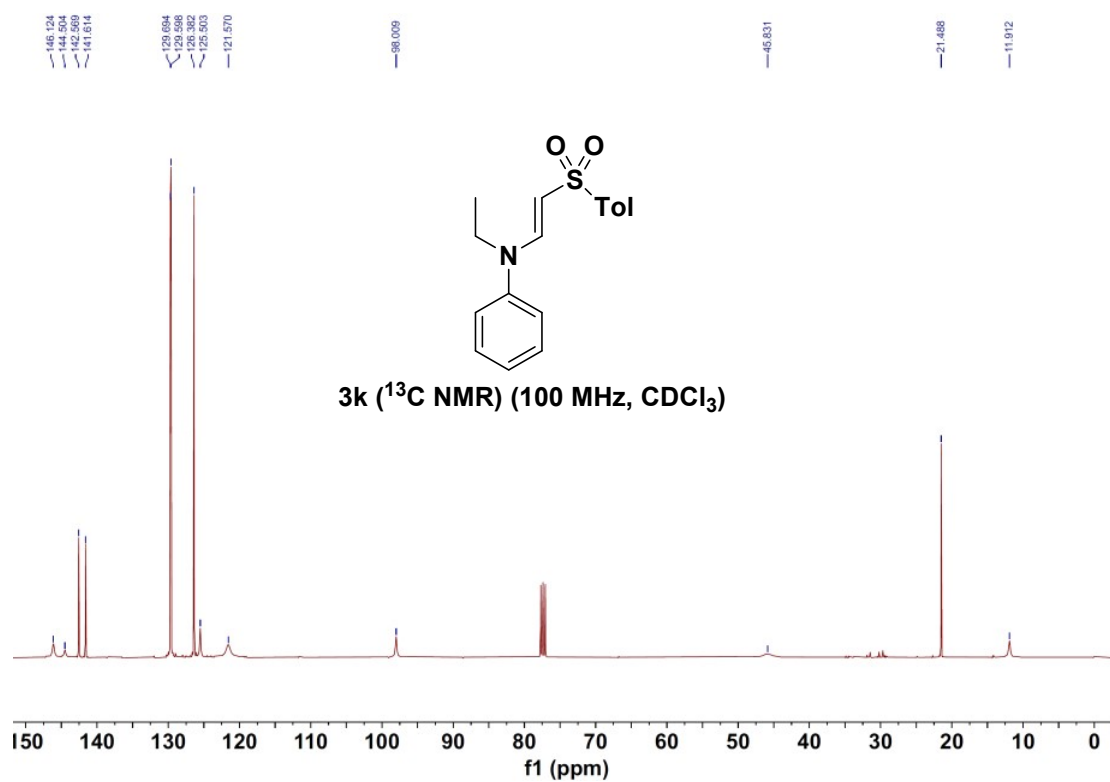

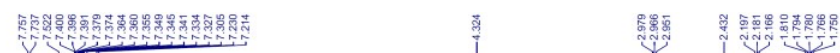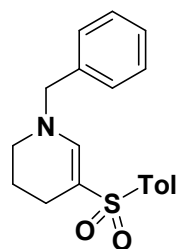

**3I (<sup>1</sup>H NMR) (400 MHz, CDCl<sub>3</sub>)**

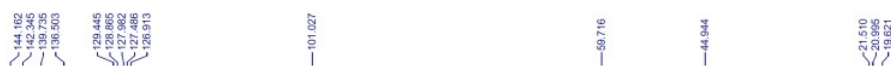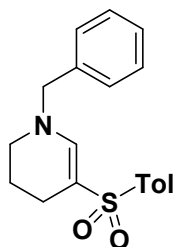

**3l (<sup>13</sup>C NMR) (100 MHz, CDCl<sub>3</sub>)**

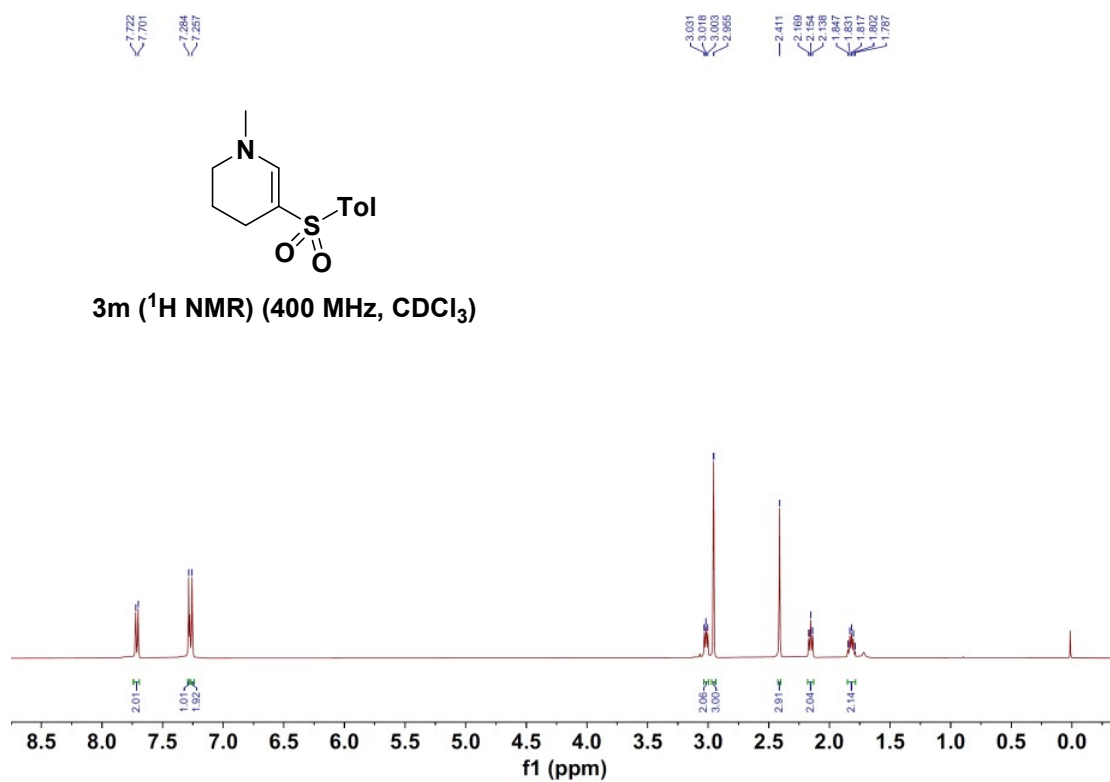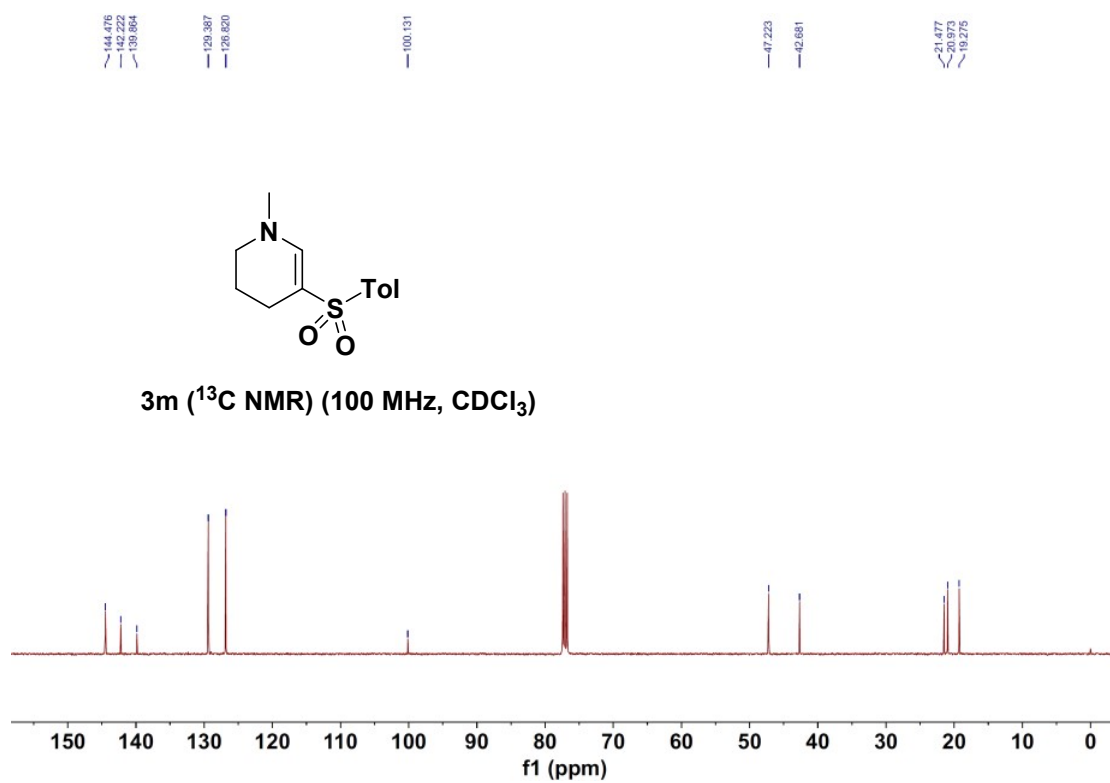

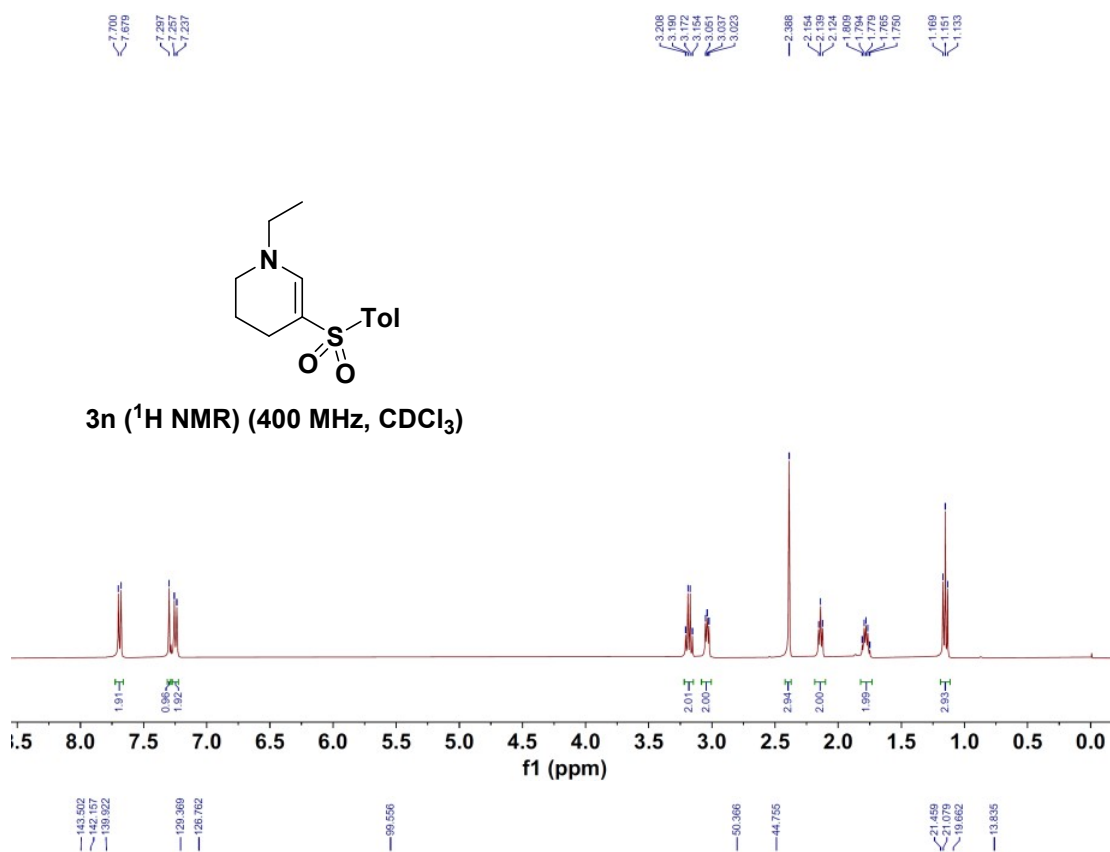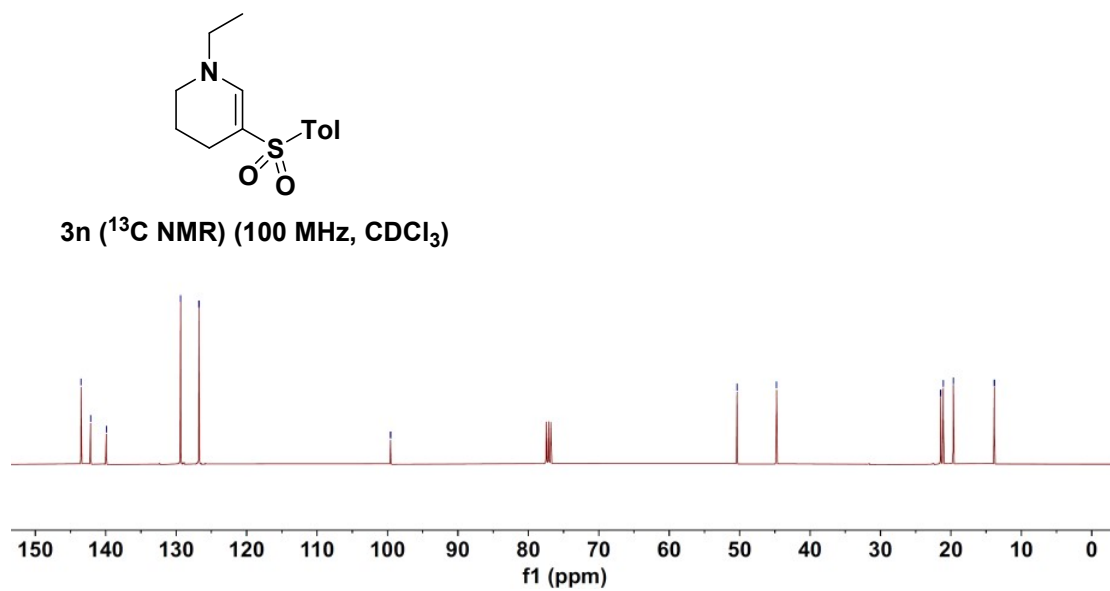

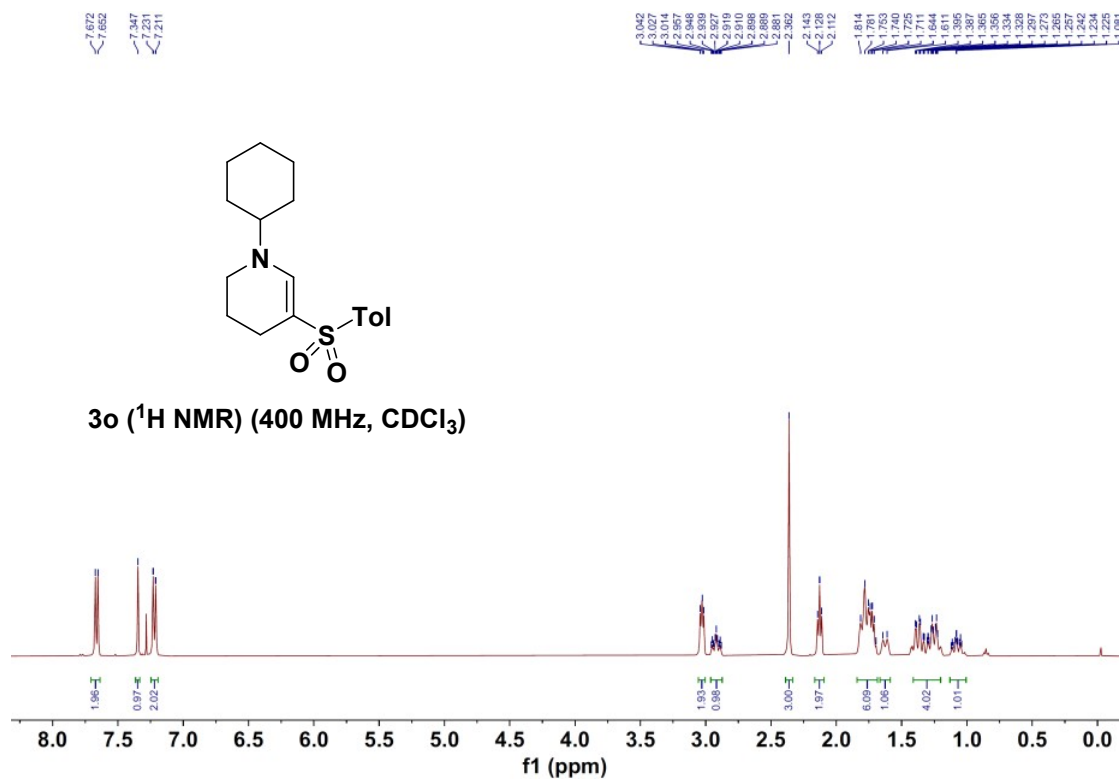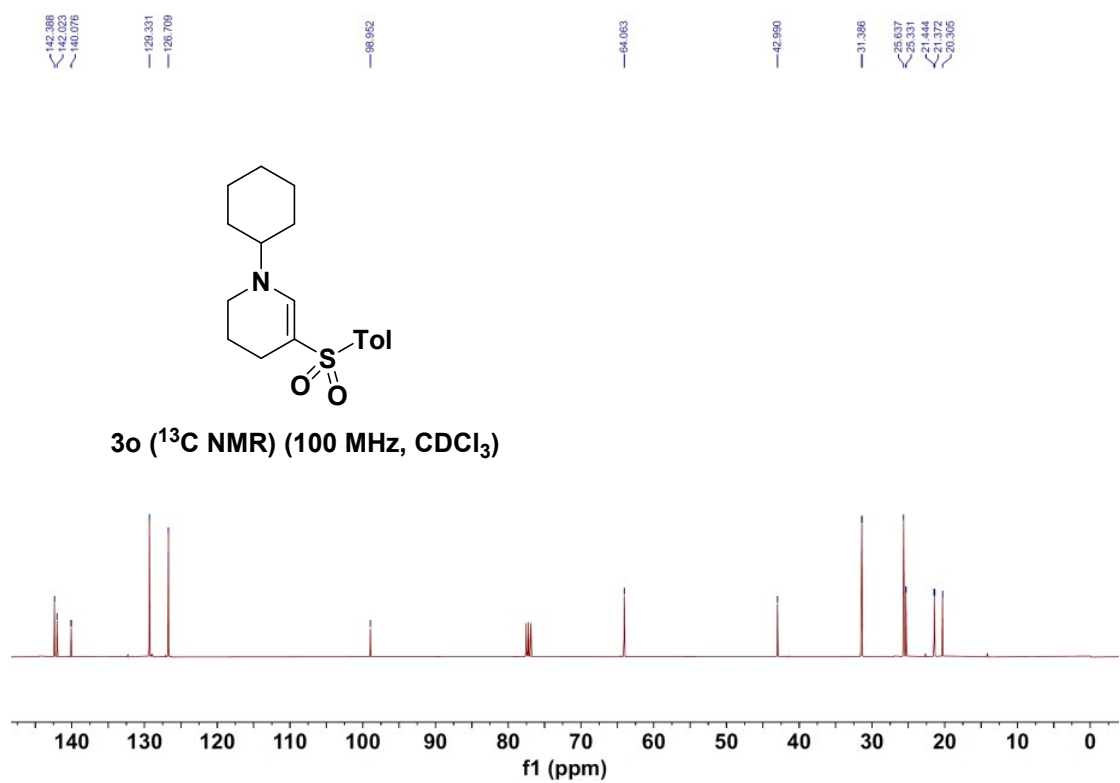

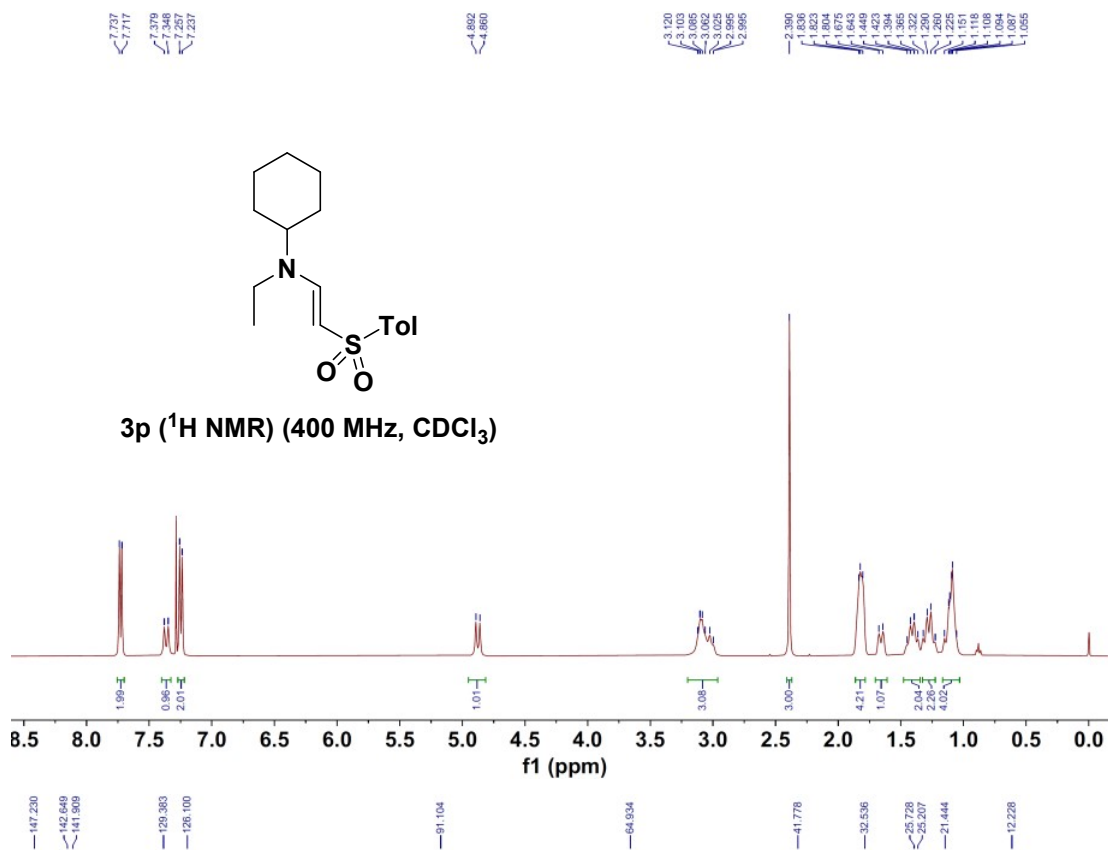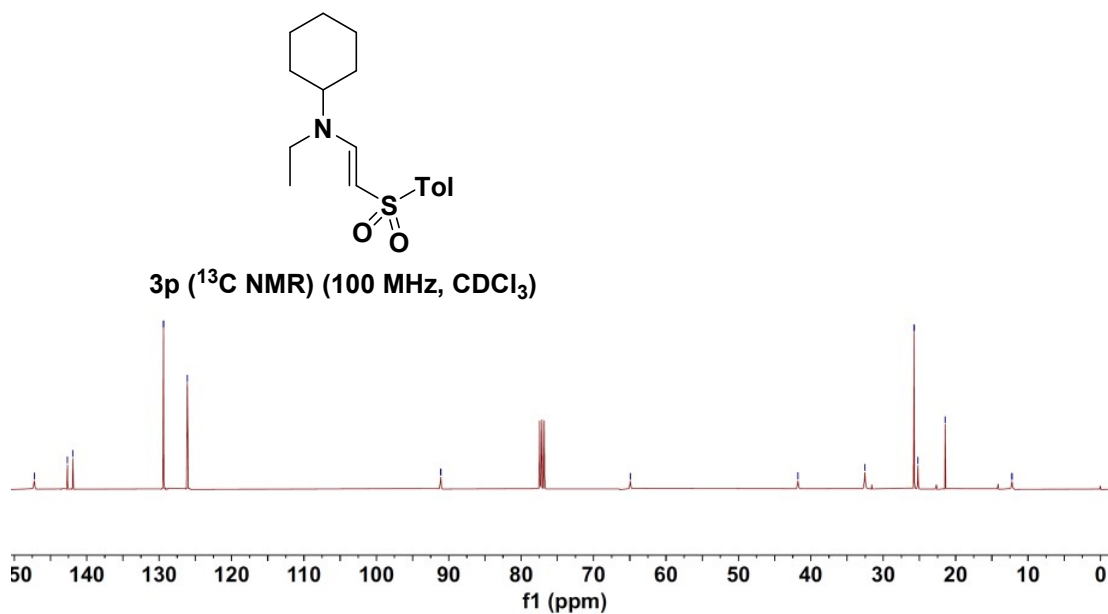

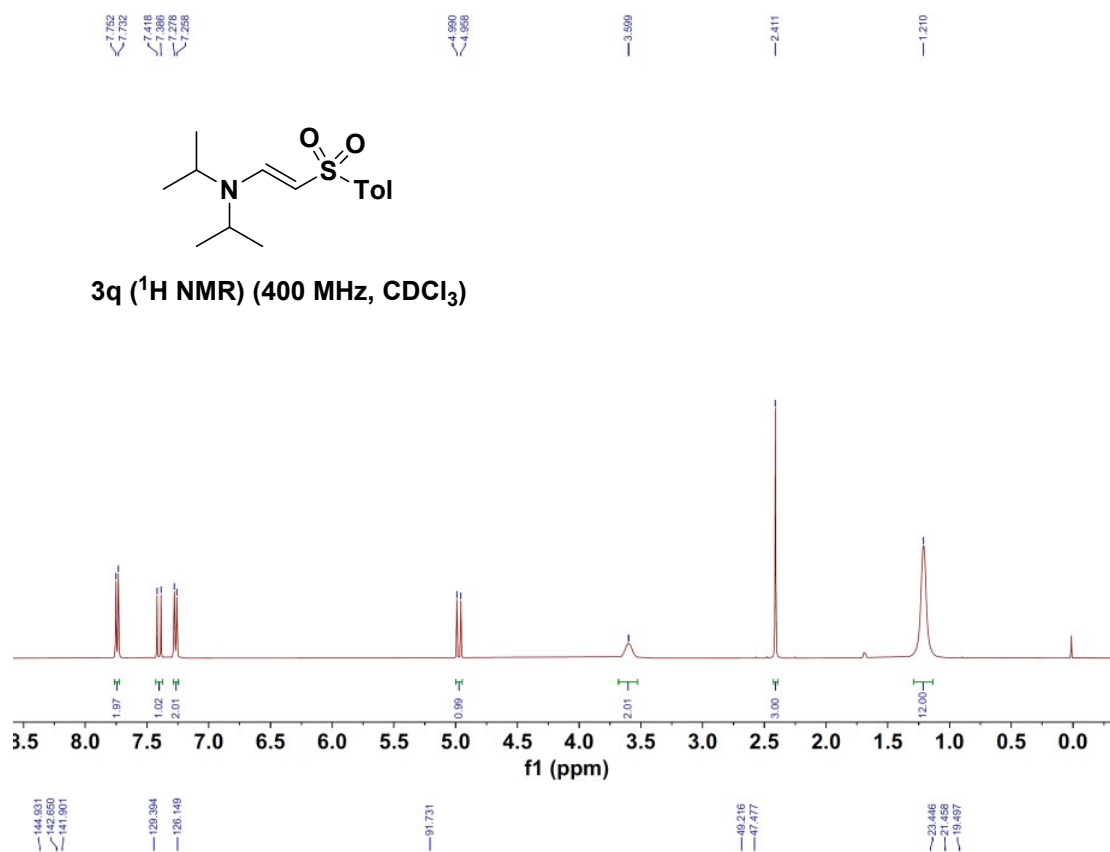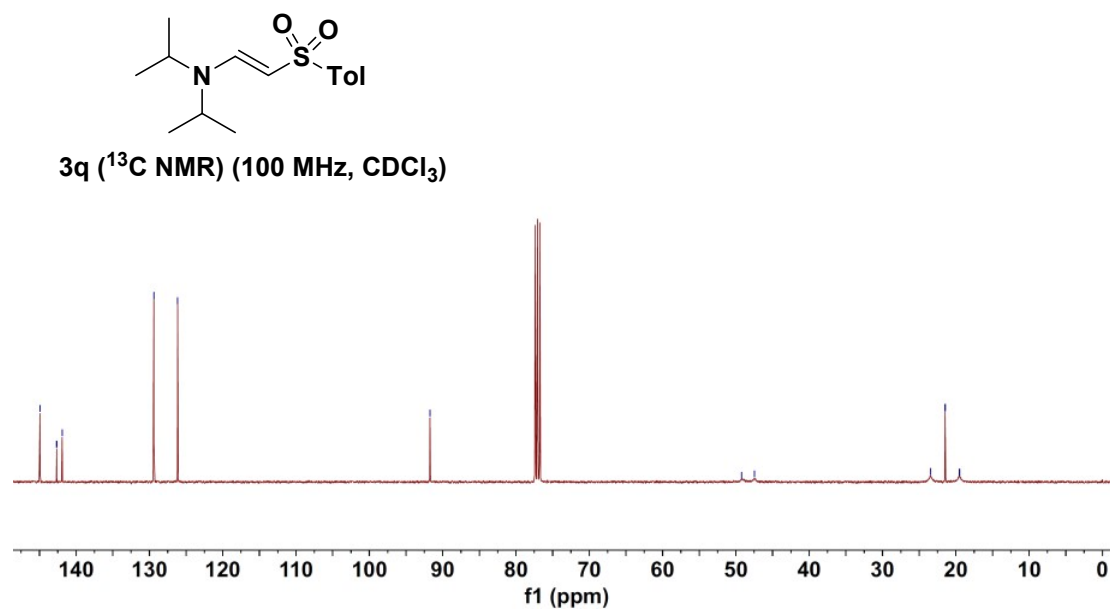

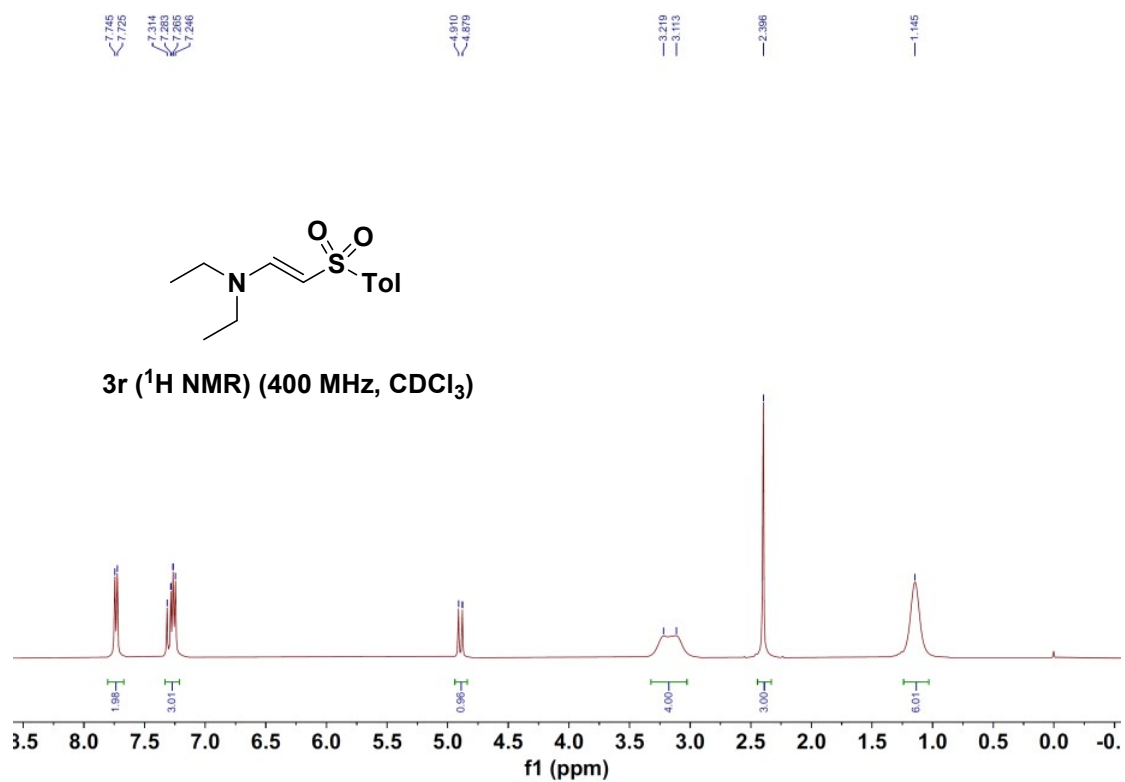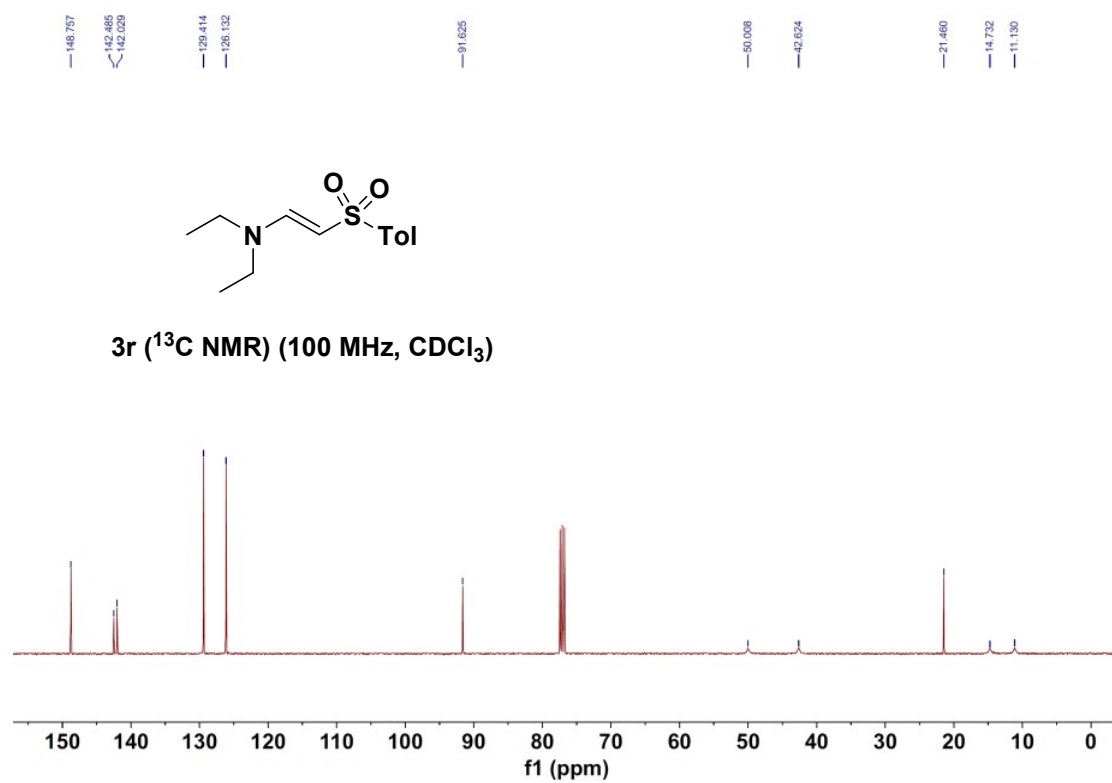

7.892  
7.883  
7.875  
7.871  
7.569  
7.551  
7.544  
7.538  
7.533  
7.529  
7.520  
7.510  
7.483  
7.478  
7.278  
7.269  
7.261  
7.113  
7.097  
7.075

3.574  
3.560  
3.546

2.310  
2.284  
2.279  
2.004  
1.985  
1.970  
1.961  
1.946

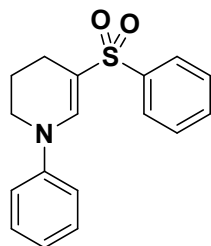

**4a ( $^1\text{H}$  NMR) (400 MHz,  $\text{CDCl}_3$ )**

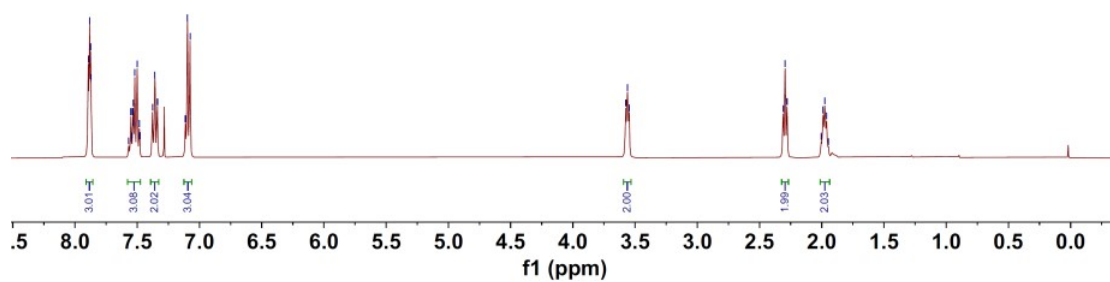

146.326  
141.931  
139.460  
132.213  
128.822  
128.862  
127.078  
123.502  
117.863  
107.568

46.892

21.127  
20.034

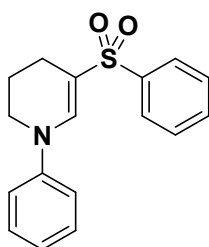

**4a ( $^{13}\text{C}$  NMR) (100 MHz,  $\text{CDCl}_3$ )**

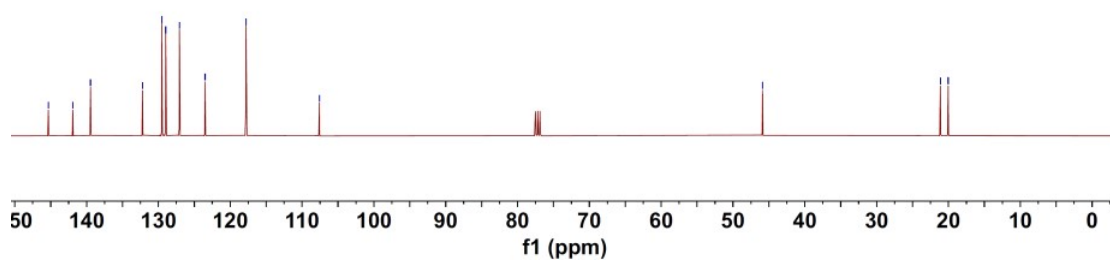

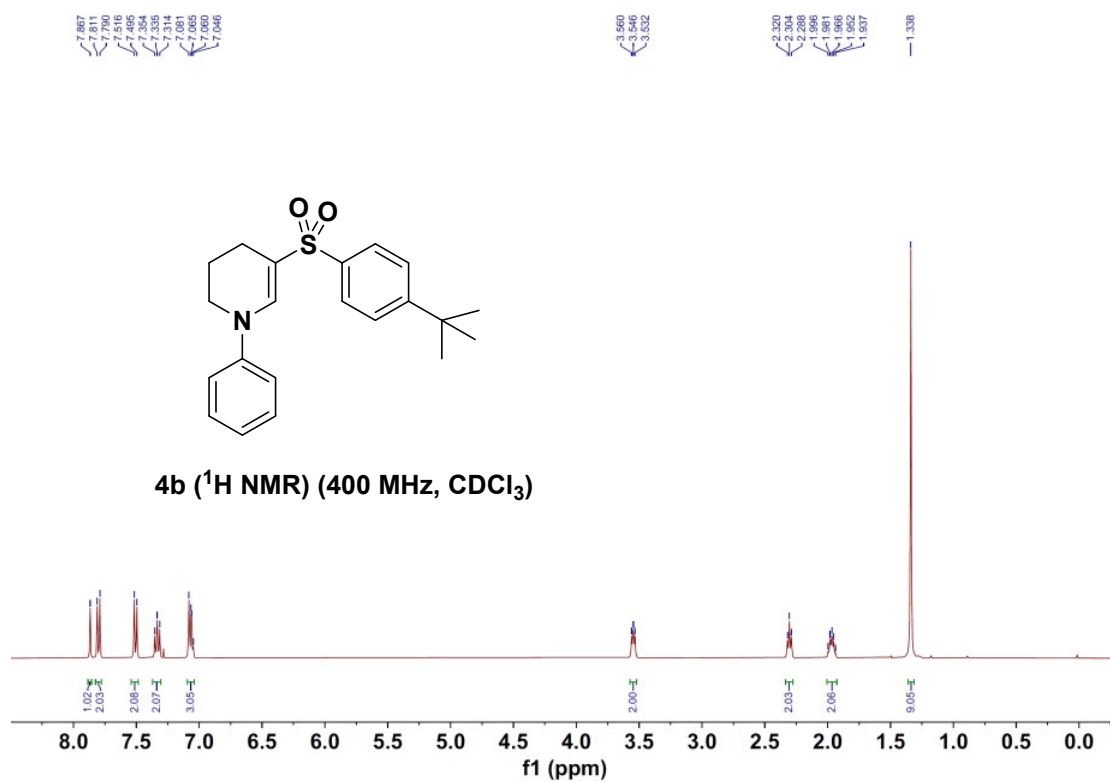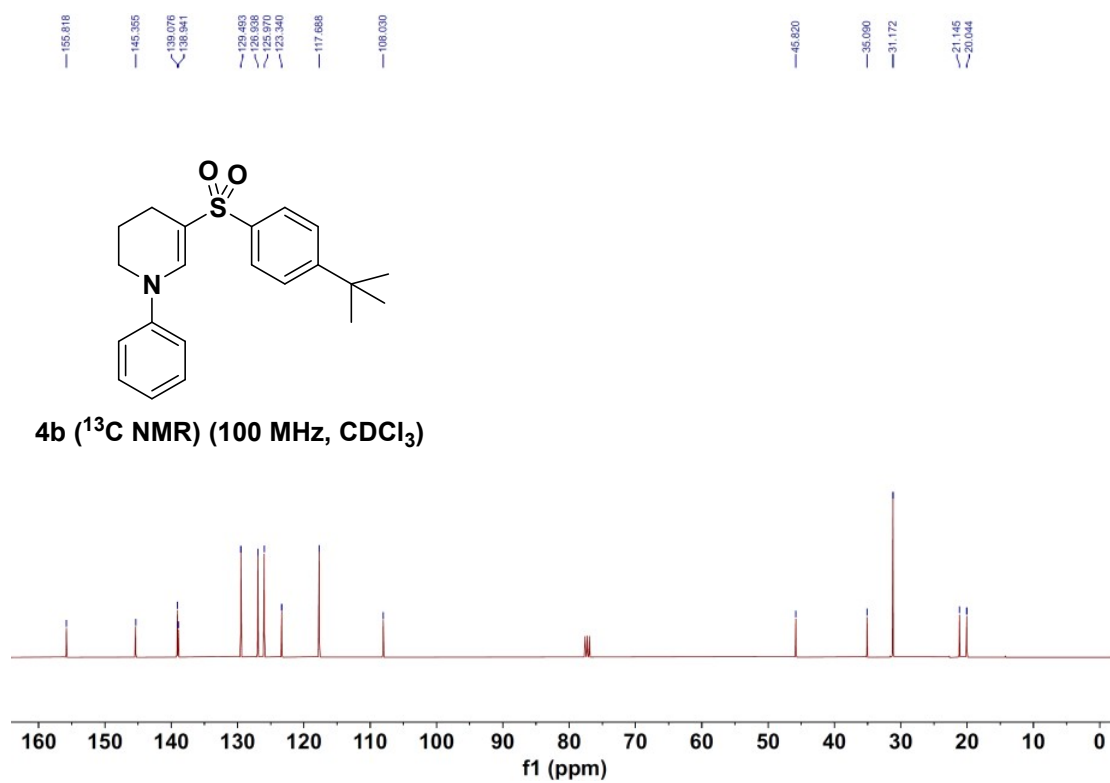

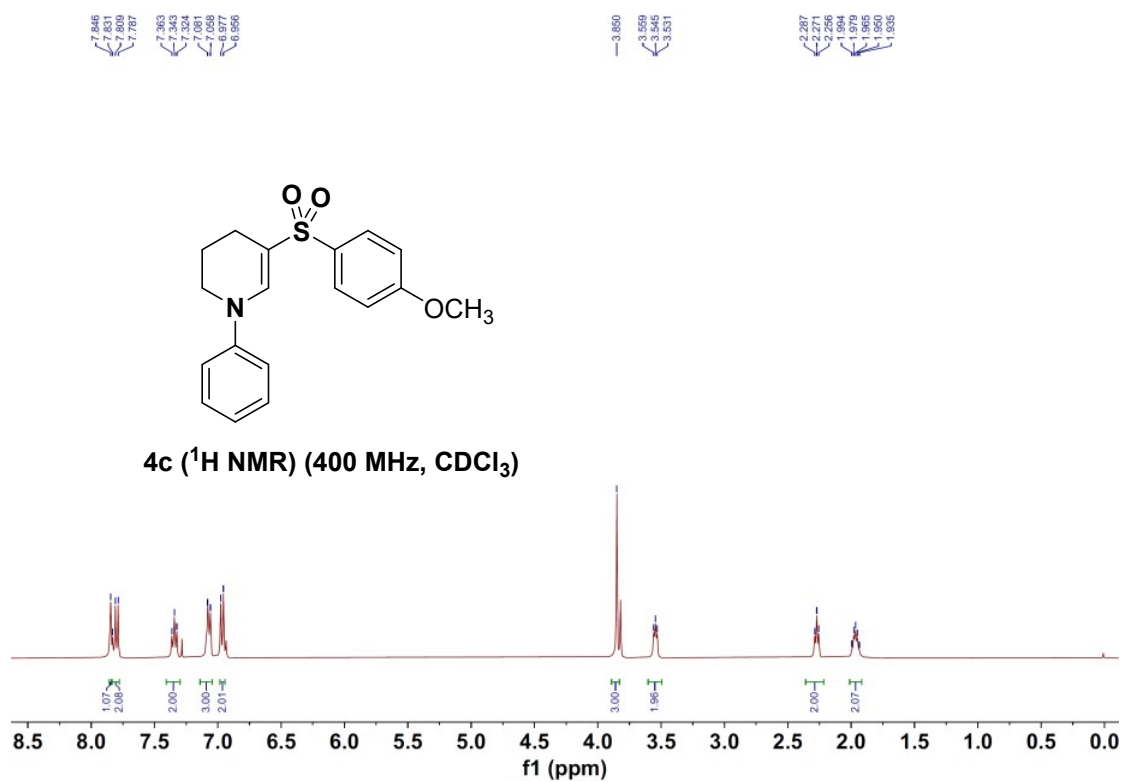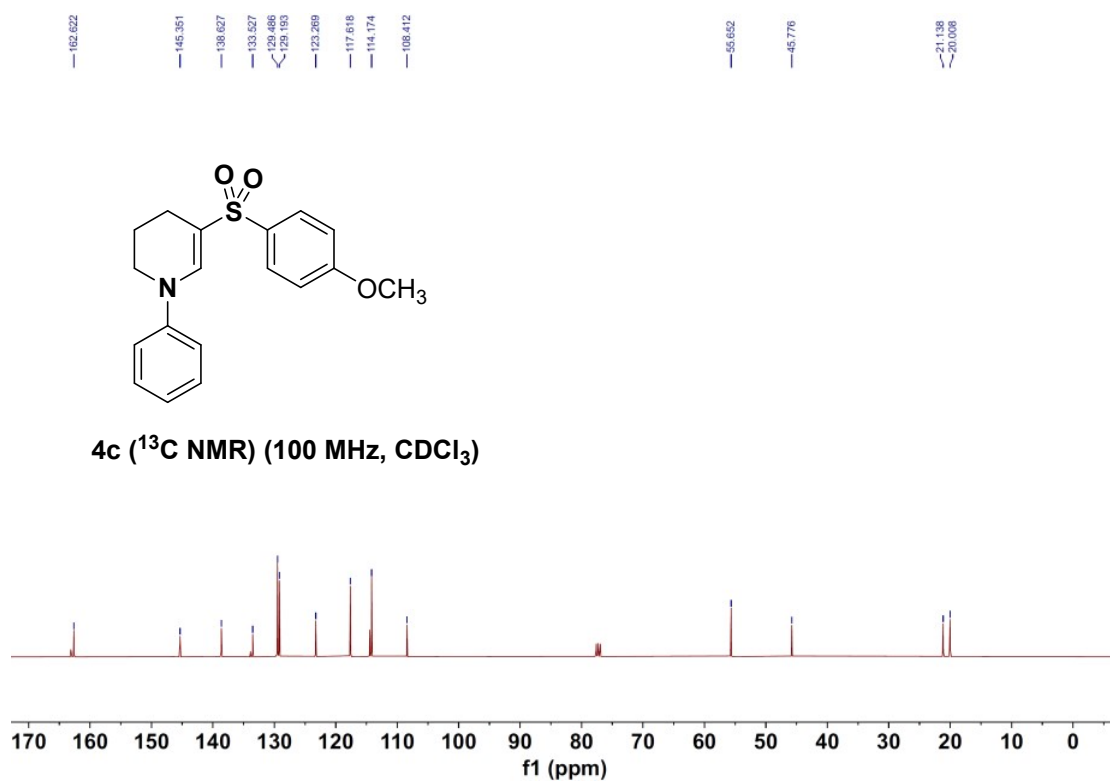

7.813  
7.805  
7.800  
7.802  
7.808  
7.803  
7.805  
7.810  
7.804  
7.802  
7.803  
7.813  
7.811  
7.812  
7.807

3.590  
3.585  
3.582

2.289  
2.284  
2.285  
2.020  
2.005  
1.991  
1.987  
1.985

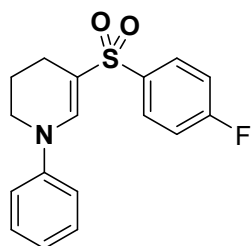

4d ( $^1\text{H}$  NMR) (400 MHz,  $\text{CDCl}_3$ )

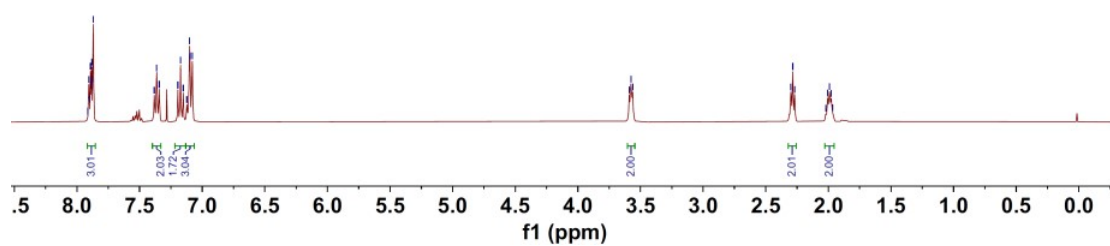

166.124  
163.602  
145.270  
139.585  
138.079  
138.048  
129.538  
129.517  
129.542  
123.621  
117.861  
116.247  
116.025  
107.316  
46.915  
21.052  
19.950

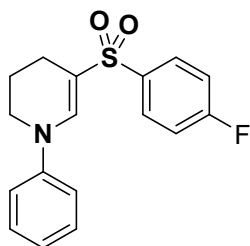

4d ( $^{13}\text{C}$  NMR) (100 MHz,  $\text{CDCl}_3$ )

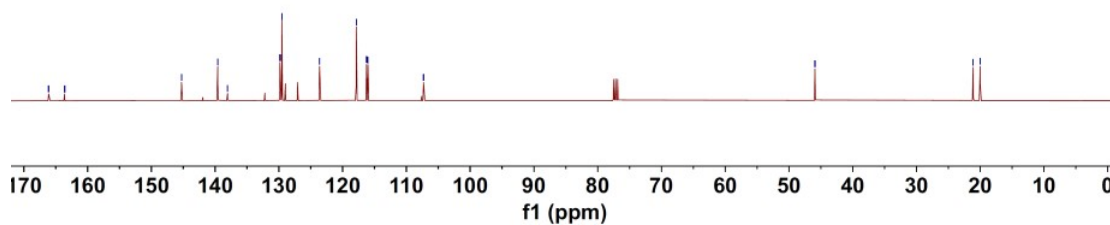

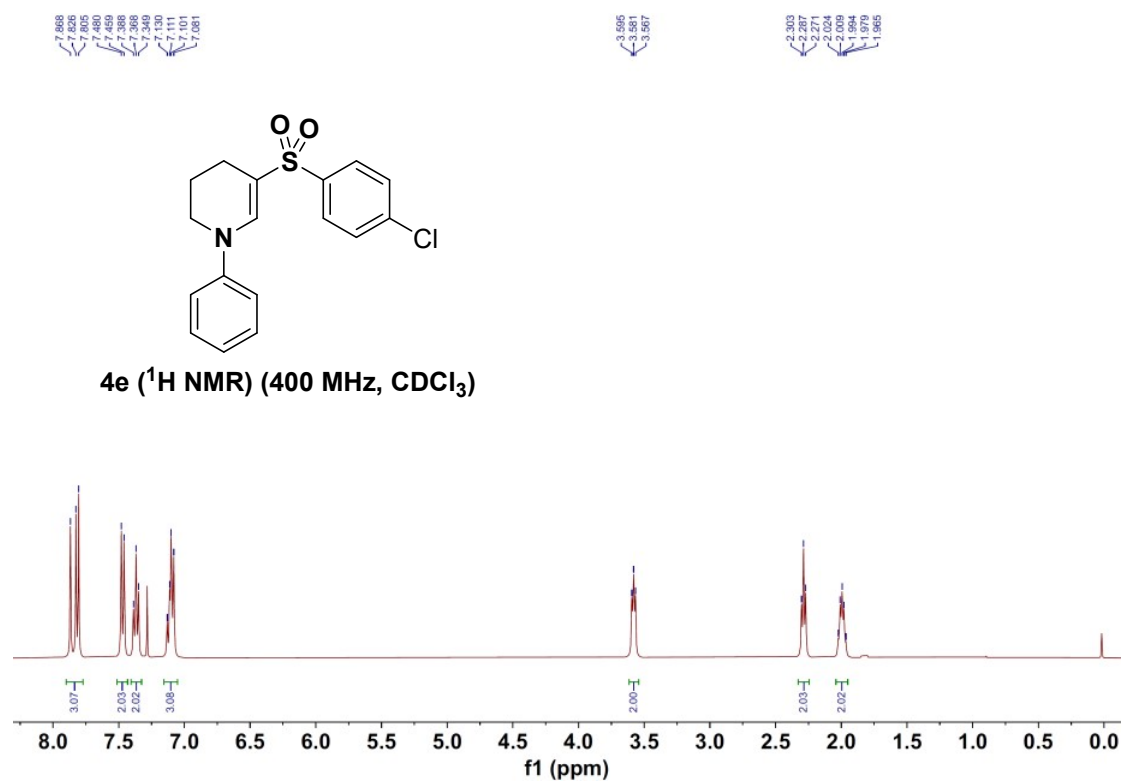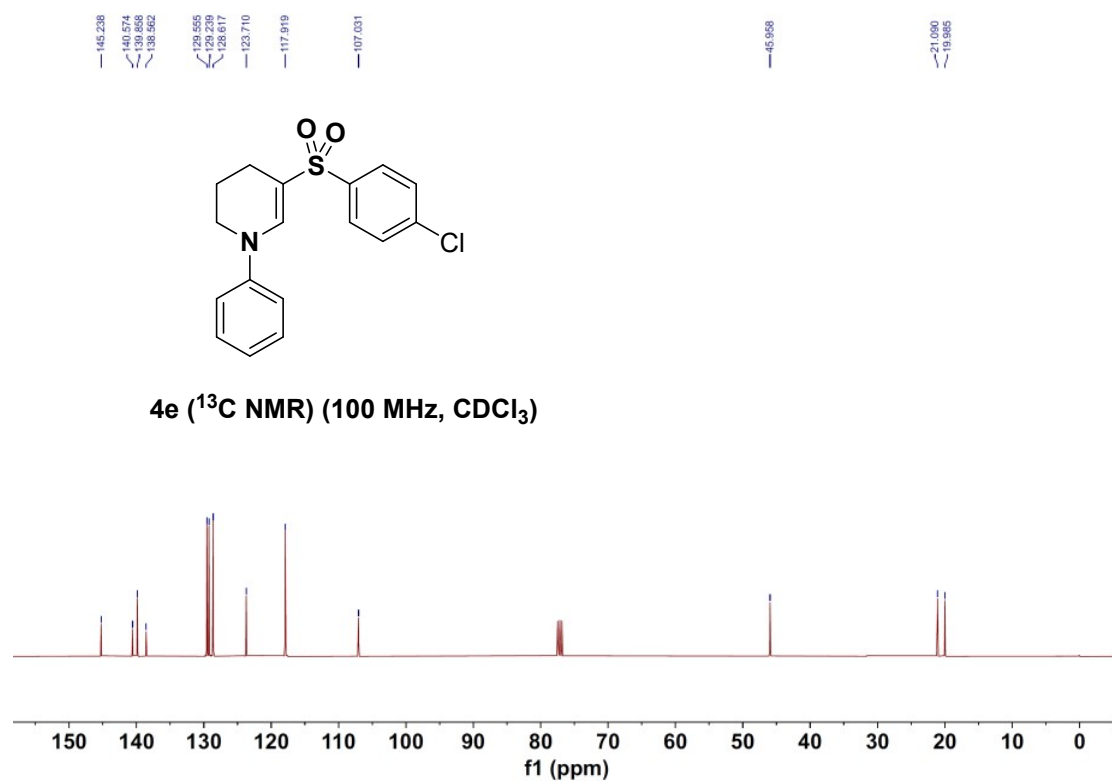

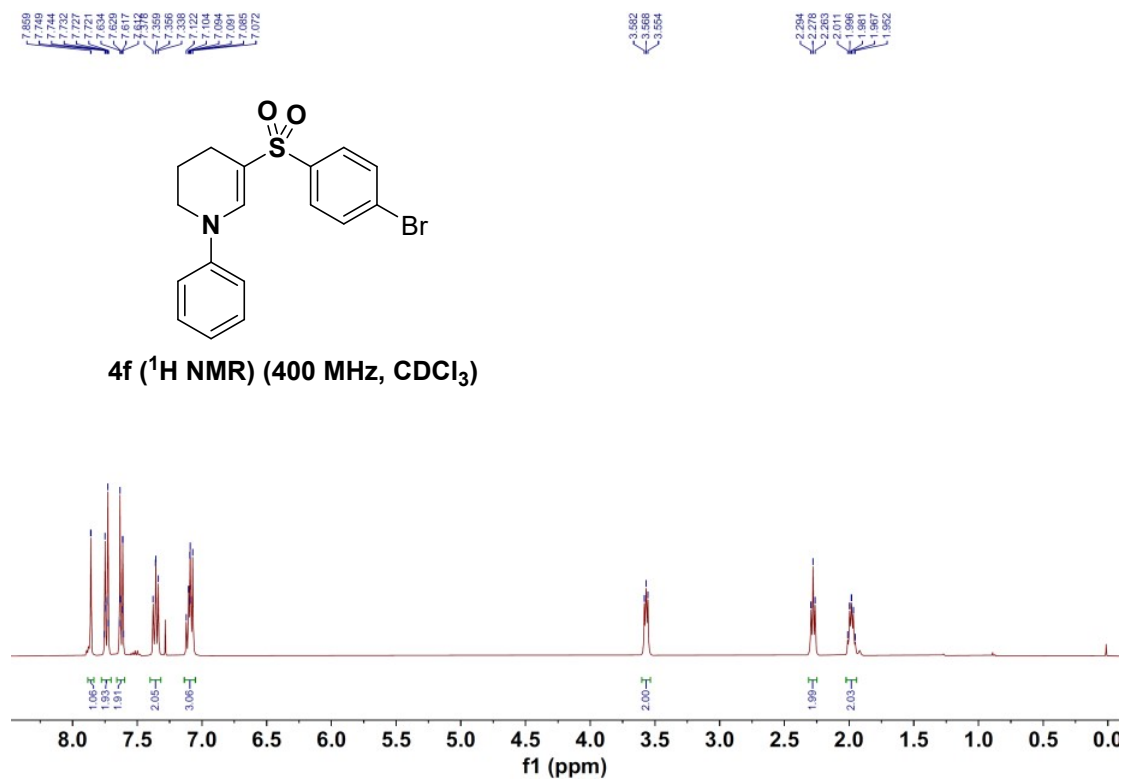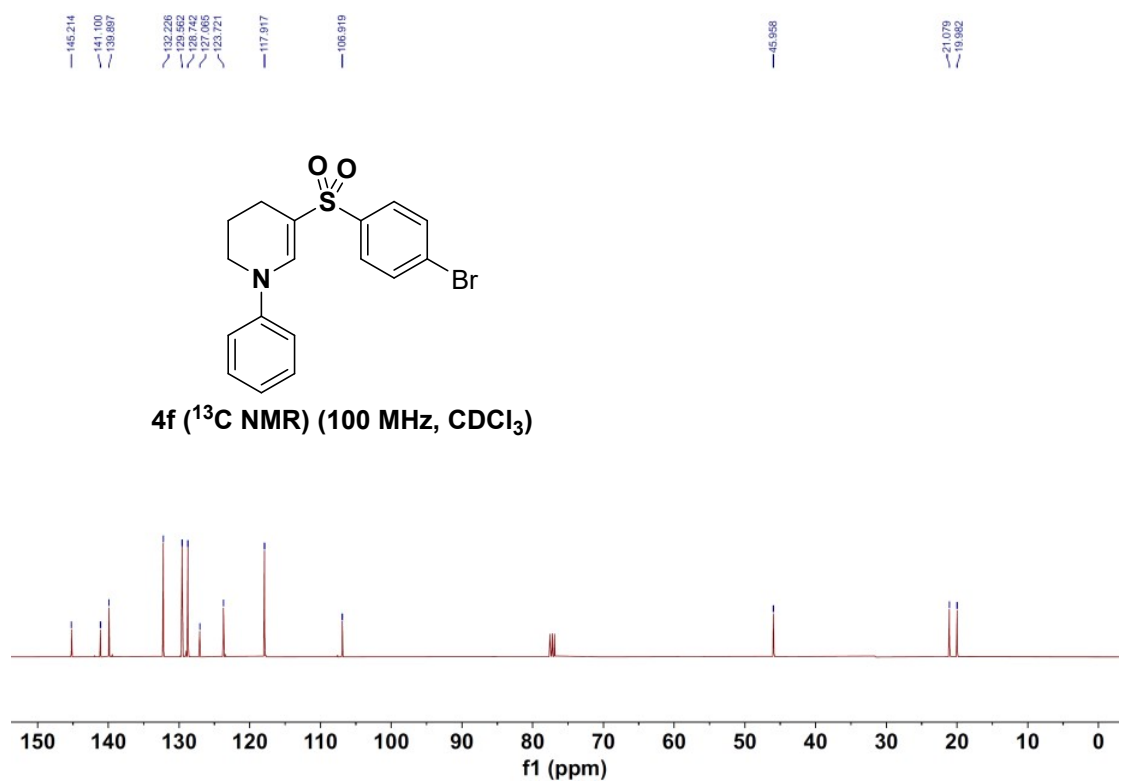

7.901  
7.893  
7.883  
7.884  
7.564  
7.558  
7.551  
7.545  
7.533  
7.519  
7.514  
7.501  
7.496  
7.397  
7.375  
7.352  
7.332  
7.312  
7.093

3.600  
3.596  
3.572

2.295  
2.289  
2.284  
2.030  
2.015  
2.003  
1.989  
1.971

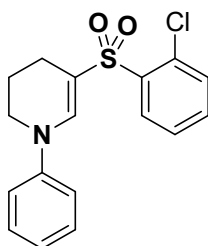

4g ( $^1\text{H}$  NMR) (400 MHz,  $\text{CDCl}_3$ )

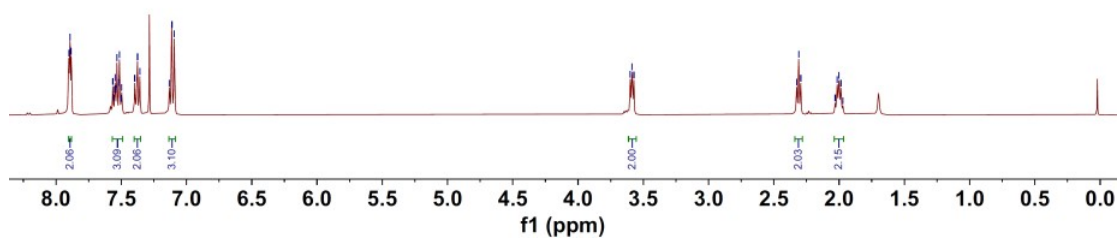

145.336  
141.909  
139.477  
132.179  
129.520  
128.956  
127.108  
123.504  
118.117  
117.804  
107.560

45.890

21.142  
20.077

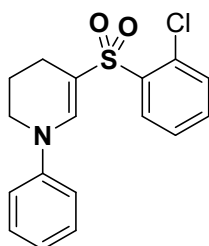

4g ( $^{13}\text{C}$  NMR) (100 MHz,  $\text{CDCl}_3$ )

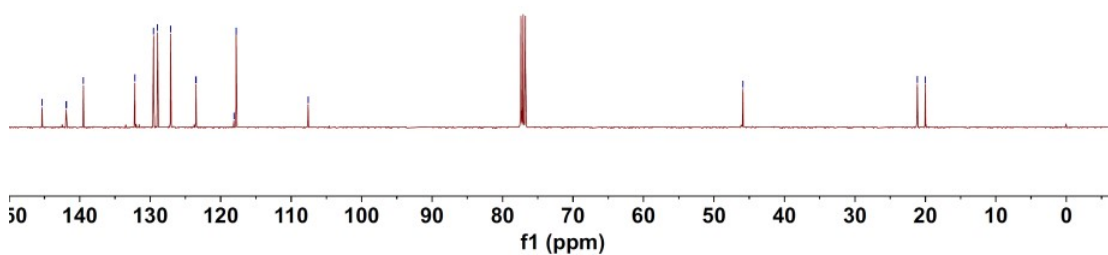

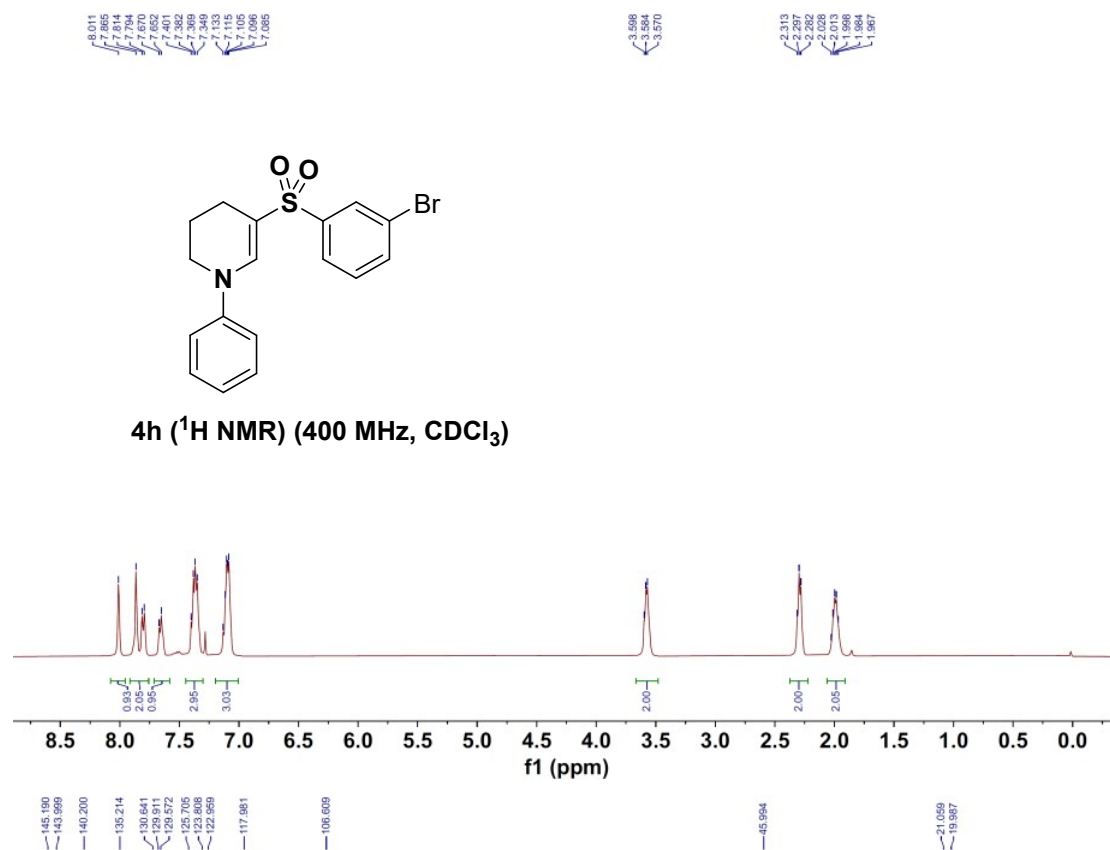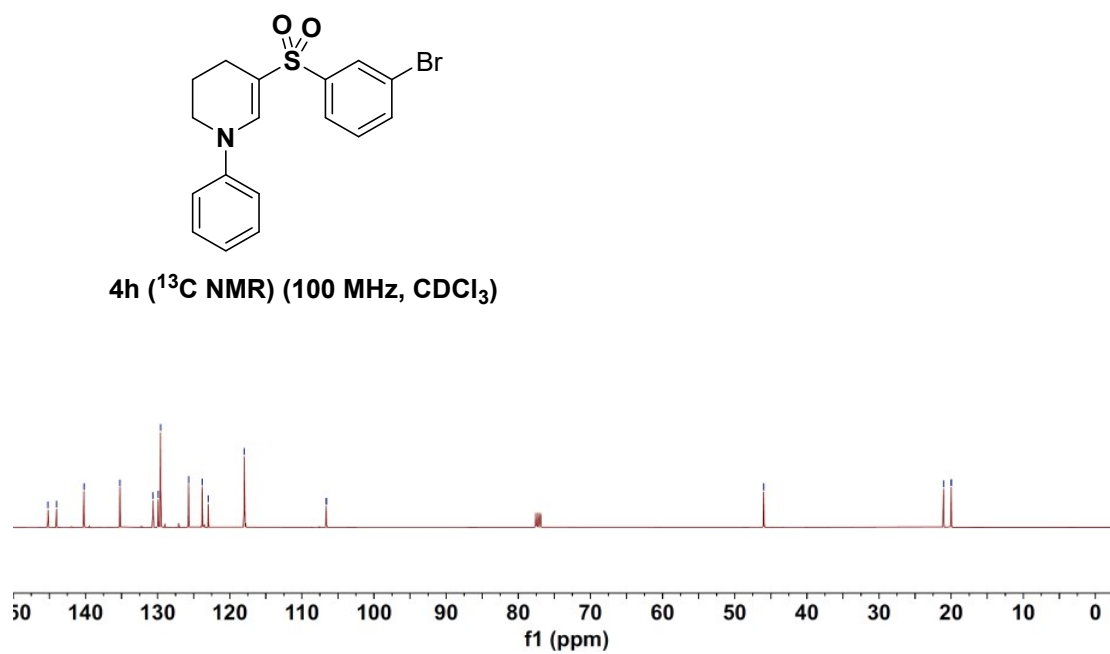

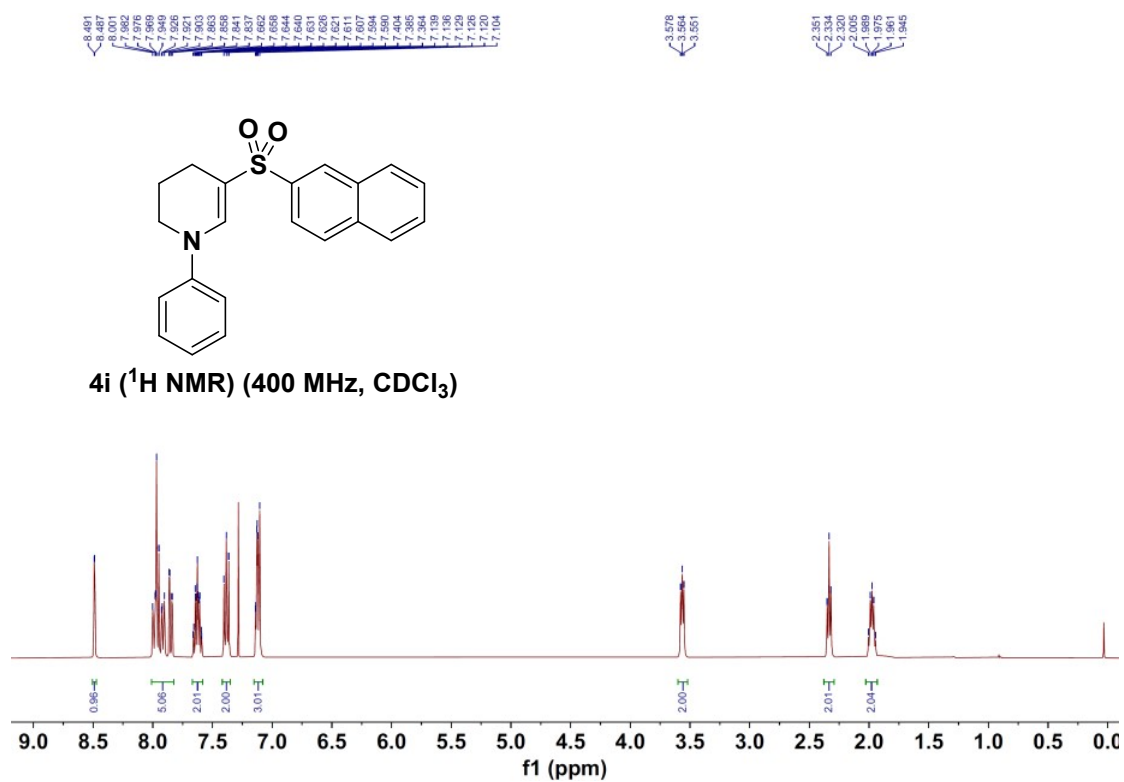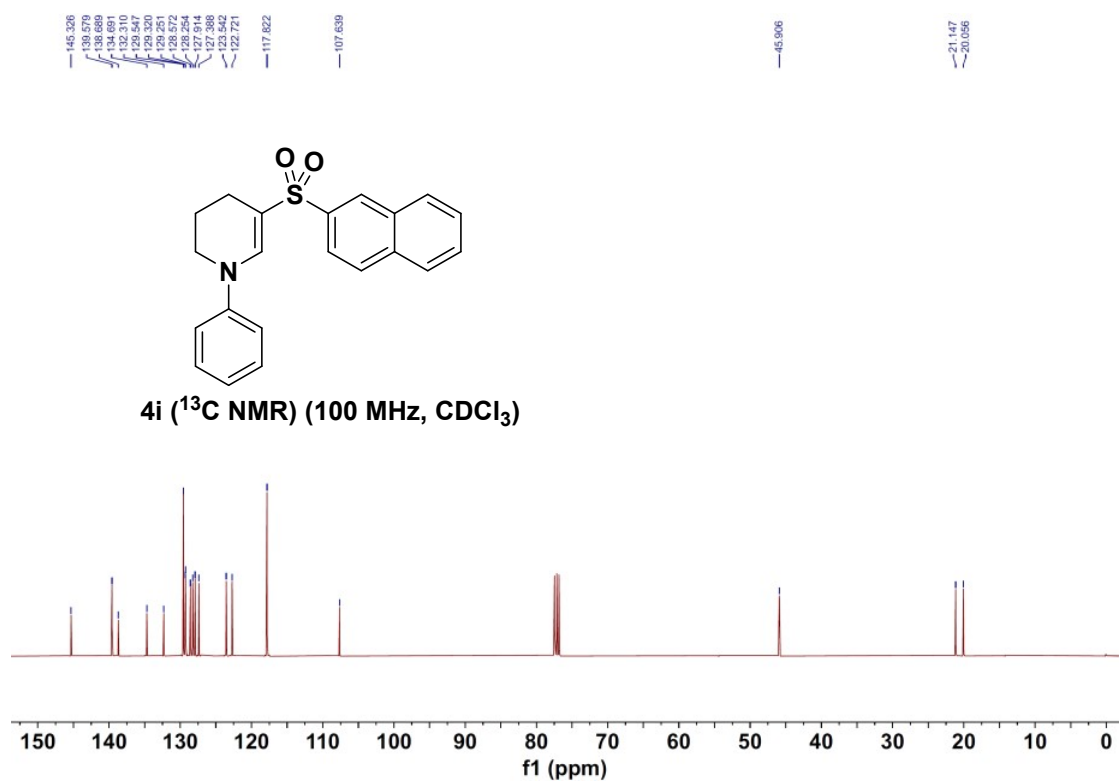

7.509  
7.498  
7.488  
7.480  
7.475  
7.466  
7.452  
7.384  
7.345  
7.339  
7.330  
7.319  
7.167  
7.155  
7.135  
7.115

3.862  
3.853  
3.824

2.493  
2.483  
2.448  
1.918  
1.905  
1.895  
1.885  
1.869  
1.821  
1.805  
1.792  
1.777  
1.762

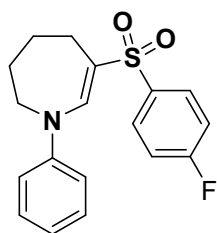

**4j ( $^1\text{H}$  NMR) (400 MHz,  $\text{CDCl}_3$ )**

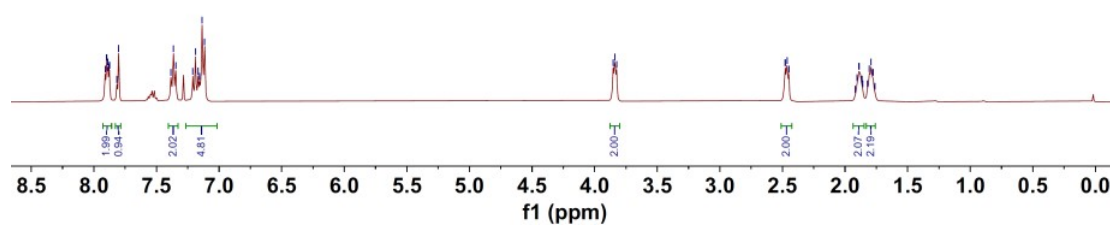

166.125  
163.602  
147.355  
145.140  
138.077  
138.046  
129.961  
129.868  
129.485  
124.157  
119.626  
116.239  
116.015  
112.946

51.922

27.656  
26.023  
25.583

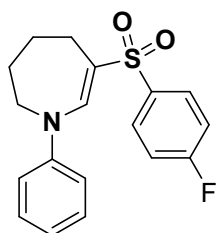

**4j ( $^{13}\text{C}$  NMR) (100 MHz,  $\text{CDCl}_3$ )**

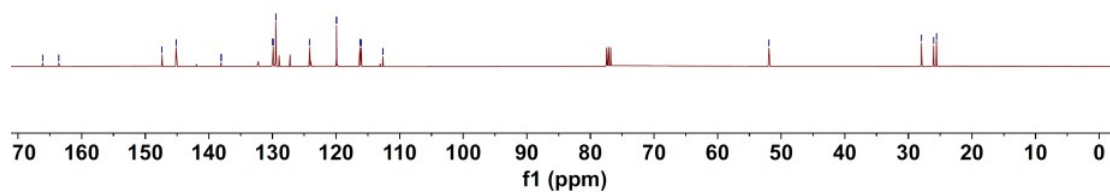

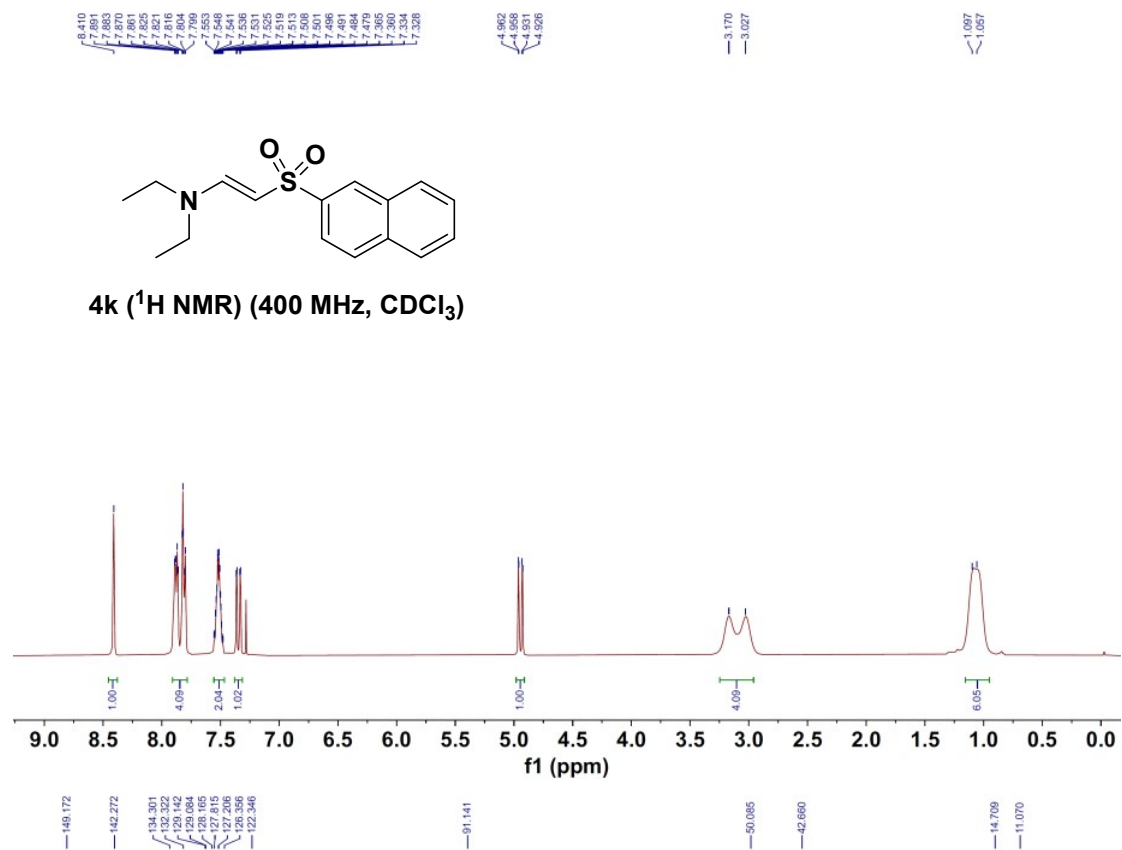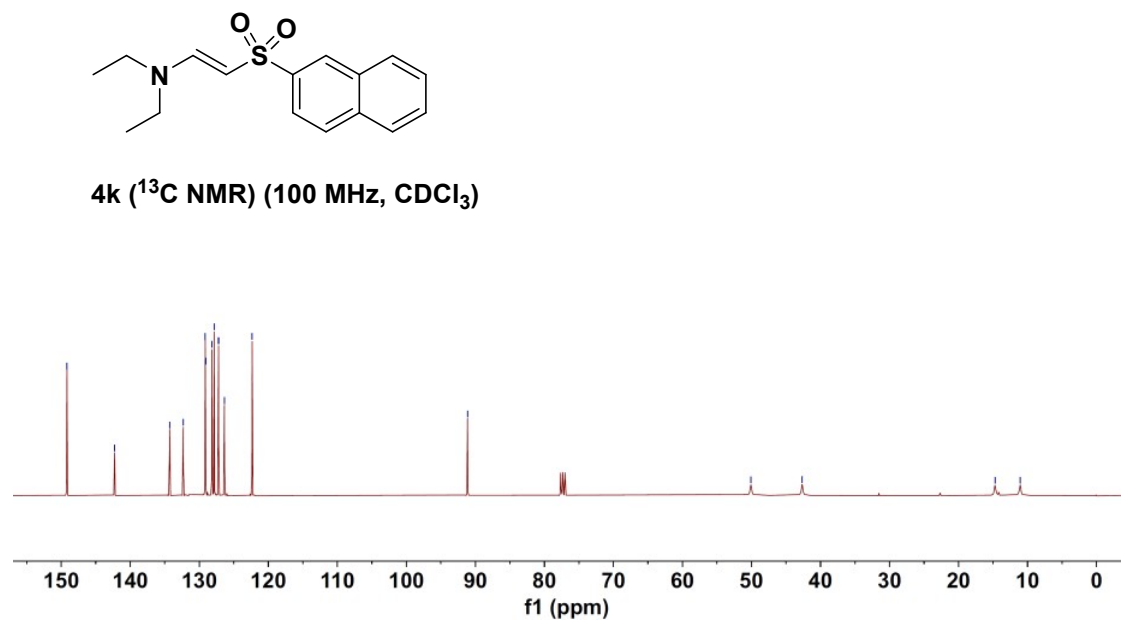

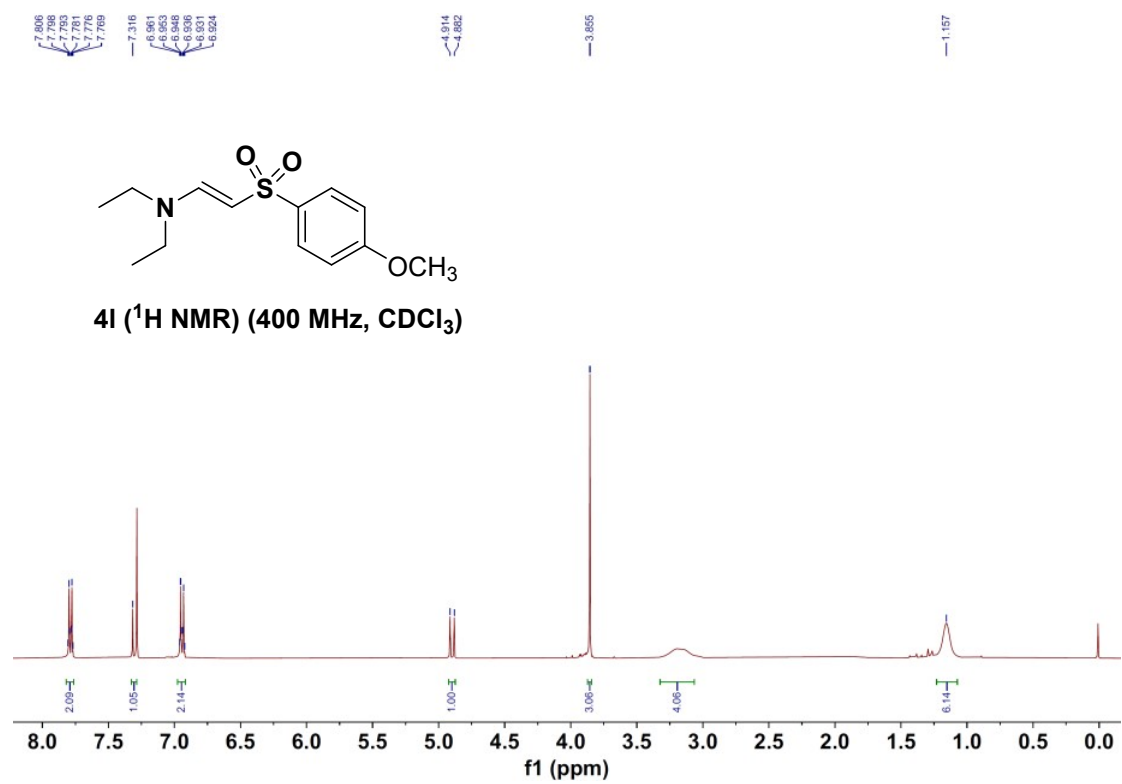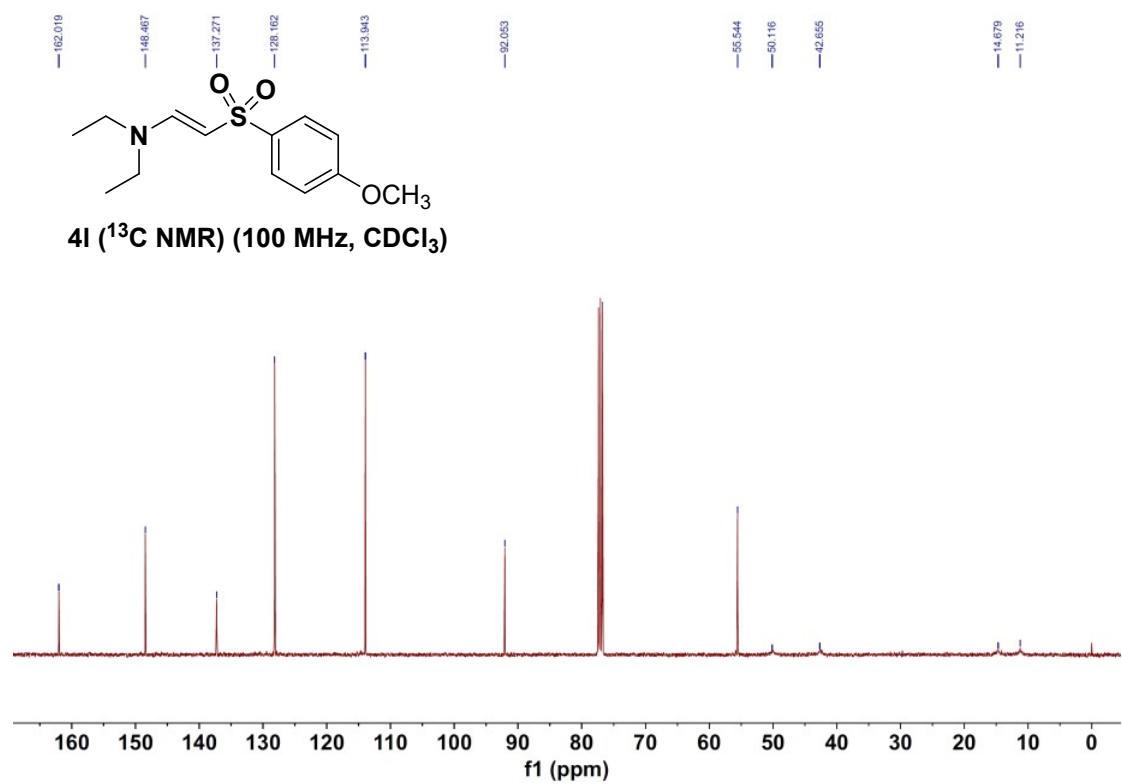

7.725  
7.720  
7.718  
7.703  
7.697  
7.693  
7.687  
7.581  
7.576  
7.519  
7.524

4.886  
4.855

3.254  
3.108

1.176  
1.132

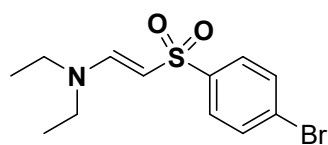

4m ( $^1\text{H}$  NMR) (400 MHz,  $\text{CDCl}_3$ )

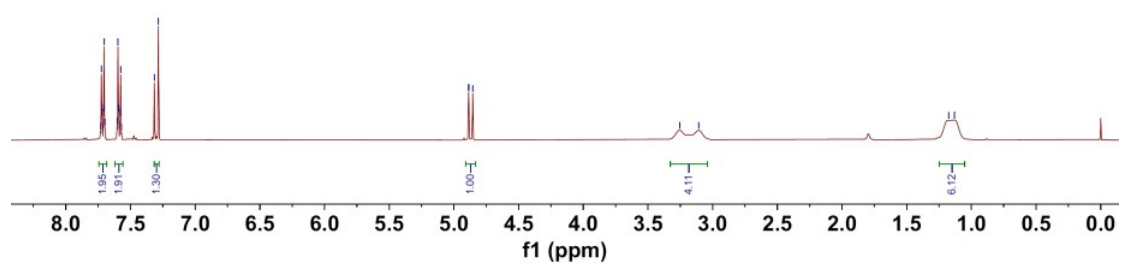

149.332

144.512

132.015

127.793

126.133

90.756

50.178

42.734

14.738

11.116

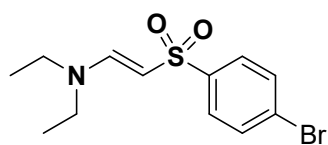

4m ( $^{13}\text{C}$  NMR) (100 MHz,  $\text{CDCl}_3$ )

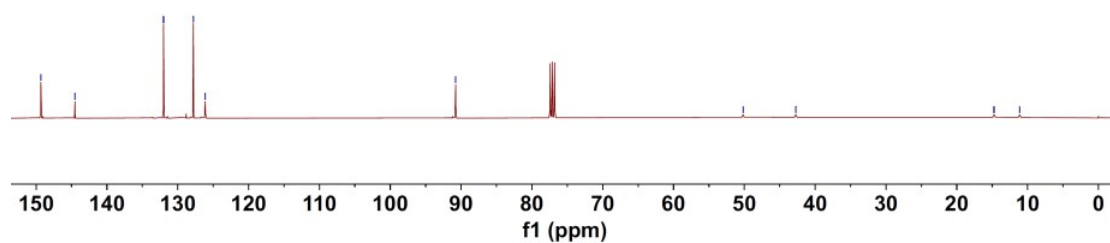

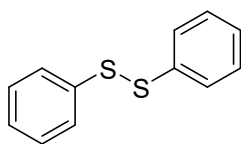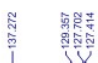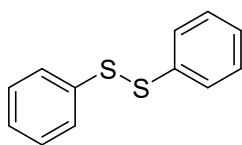

Supplement: d1gc04703e1.pdf [file d1gc04703e1.pdf]
